1 **Title**

2 **Organelle-selective click labeling coupled with flow cytometry allows high-throughput CRISPR**  
3 **screening of genes involved in phosphatidylcholine metabolism**

4

5 **Authors**

6 Masaki Tsuchiya<sup>1,2</sup>, Nobuhiko Tachibana<sup>1,2</sup>, Kohjiro Nagao<sup>3</sup>, Tomonori Tamura<sup>1\*</sup>, and Itaru  
7 Hamachi<sup>1,4\*</sup>

8

9 1 Department of Synthetic Chemistry and Biological Chemistry, Graduate School of Engineering,  
10 Kyoto University, Katsura, Nishikyo-ku, Kyoto 615-8510, Japan

11 2 PRESTO (Precursory Research for Embryonic Science and Technology, JST), Sanbancho,  
12 Chiyodaku, Tokyo, 102-0075, Japan

13 3 Department of Biophysical Chemistry, Kyoto Pharmaceutical University, 5 Misasaginakauchi-cho,  
14 Yamashina-ku, Kyoto, 607-8414, Japan

15 4 ERATO (Exploratory Research for Advanced Technology, JST), Sanbancho, Chiyodaku, Tokyo,  
16 102-0075, Japan

17 \* Correspondence: [tamura@sbchem.kyoto-u.ac.jp](mailto:tamura@sbchem.kyoto-u.ac.jp), [ihamachi@sbchem.kyoto-u.ac.jp](mailto:ihamachi@sbchem.kyoto-u.ac.jp)

18

19

1 **Abstract**

2           Lipids comprise biomembranes and are involved in many crucial cell functions. While  
3 cellular lipid synthesis and transport appear to be governed by intricate protein networks, the whole  
4 scheme is insufficiently understood. Although functional genome-wide screening should contribute  
5 to deciphering the regulatory networks of lipid metabolism, technical challenges remain – especially  
6 for high-throughput readouts of lipid phenotypes. Here, we coupled organelle-selective click labeling  
7 of phosphatidylcholine (PC) with flow cytometry-based CRISPR screening technologies to convert  
8 organellar PC phenotypes into a simple fluorescence readout for genome-wide screening. This  
9 technique, named O-ClickFC, was successfully applied in genome-scale CRISPR-knockout screens  
10 to identify previously reported genes associated with PC synthesis (*PCYT1A*, *ACACA*), vesicular  
11 membrane trafficking (*SEC23B*, *RAB5C*), and non-vesicular transport (*PITPNB*, *STARD7*). Moreover,  
12 this work revealed previously uncharacterized roles of *FLVCR1* as a new choline transporter; *CHEK1*  
13 as a post-translational regulator of the PC-synthetic pathway, and *TMEM30A* as responsible for  
14 translocation of PC to the outside of the plasma membrane bilayer. These findings demonstrate the  
15 versatility of O-ClickFC as an unprecedented platform for genetic dissection of cellular lipid  
16 metabolism.

17

18

19

## 1 **Introduction**

2           Lipids are a broad class of metabolites with diverse structures and myriad essential functions  
3 for the cell (Harayama and Riezman, 2018; Van Meer et al., 2008). Cellular lipid metabolism involves  
4 complicated protein networks that spatiotemporally regulate lipid synthesis and trafficking over  
5 various organelles (Vance, 2015). Thus, identifying enzymes/proteins in the network is a prerequisite  
6 for unravelling the molecular mechanisms underlying lipid-mediated biological processes, such as  
7 cell signaling and inter- or intra-organelle membrane transport.

8           Phosphatidylcholine (PC) is the most abundant phospholipid in eukaryotic membranes, and  
9 its metabolic abnormalities are associated with various diseases including cancer, lipodystrophy,  
10 muscular dystrophy, and retinal dystrophy (Glunde et al., 2011; Hoover-Fong et al., 2014; Mitsunashi  
11 et al., 2011; Payne et al., 2014; Ridgway, 2013; van der Veen et al., 2017). Since the pioneering work  
12 by Kennedy and coworkers in 1956, significant progress has been made in understanding the  
13 enzymology of individual proteins involved in the PC biosynthetic pathway (Gibellini and Smith,  
14 2010). However, whole protein networks regulating PC abundance and subcellular distribution  
15 remain elusive. Over the past four decades, functional genetic screens based on auxotrophy of yeast  
16 mutants have identified an extensive set of PC regulators (Atkinson et al., 1980). However, this  
17 conventional approach, which mostly relies on cell proliferation, has difficulty discovering genes that  
18 are not fatal but cause perturbations in PC dynamics. Fluorescent lipid-binding probes were used to  
19 identify the phospholipid scramblase from a cDNA library (Suzuki et al., 2013), but there is presently  
20 no fluorescent PC-binding probe. Although mass spectrometry (MS) coupled with subcellular  
21 fractionation can quantitatively analyze subcellular PC contents in a label-free manner (Schneiter et  
22 al., 1999), it is unsuitable for large-scale genomic screening due to its limited throughput. Until now,  
23 these technical challenges have limited our understanding of the link between PC metabolism and the  
24 20,000 protein-coding genes in the human genome.

25           The recent emergence of genome-wide clustered regularly interspaced short palindromic  
26 repeats (CRISPR) knockout (KO) screens has the potential to provide a high-throughput platform for  
27 identifying key genetic factors in mammalian cells (Shalem et al., 2015). Pooled CRISPR screening

1 builds on a library of cells bearing individual genetic perturbations. In a typical workflow, cells  
2 exhibiting the phenotype of interest are physically separated by cell viability or fluorescence-  
3 activated cell sorting (FACS), followed by next-generation sequencing (NGS) of sgRNA abundance  
4 to identify target genes. The pooled format makes it practical to handle large-scale libraries (~20,000  
5 genes for human) in a single experiment, thereby accelerating the discovery process of phenotype-to-  
6 genotype relationships. When this technology is applied to identify PC regulatory networks, the most  
7 critical task is deciding how to convert PC phenotypes into a simple readout for screening.  
8 Furthermore, with the aim of exploring key genes affecting subcellular/suborganelle PC distribution,  
9 the reporter requires organelle/suborganelle-level spatial resolution.

10 Recently, we reported a technology for selective labeling and imaging of PC in target  
11 organelles (Tamura et al., 2020). This method involves metabolic incorporation of azido-choline (N<sub>3</sub>-  
12 Cho) in live cells followed by an organelle-directed copper-free click reaction to modify the *de novo*-  
13 synthesized azido-PC (N<sub>3</sub>-PC) with fluorescent reporters. Using this method, PC in various organelle  
14 membranes can be simultaneously tagged with different-colored fluorescent dyes, which allows PC  
15 trafficking and dynamics between organelles to be observed in live cells by confocal microscopy.

16 Here, we developed a strategy to convert organelle lipid phenotypes into a simple  
17 fluorescence readout for genome-wide screening, named O-ClickFC (Organelle-selective Click  
18 chemistry coupled with Flow Cytometry). We selected several clickable compounds with diverse  
19 spectral properties that can specifically label PCs in the endoplasmic reticulum (ER)/Golgi apparatus,  
20 mitochondria, and outer leaflet of the plasma membrane (OPM), and established a workflow for  
21 FACS analysis with multiplexed compounds. Proof-of-principle experiments clearly demonstrated  
22 that this approach can distinguish defects in PC biosynthesis and organelle transport with flow  
23 cytometry. O-ClickFC was then successfully applied to CRISPR-KO screens, which identified a total  
24 of 52 genes involved in PC metabolism and trafficking, including known genes *PCYT1A*, *ACACA*,  
25 and *STARD7*. More significantly, we discovered previously unrecognized roles for *CHEK1*, *FLVCR1*,  
26 and *TMEM30A* in PC biosynthesis, choline transport, and cell-surface PC translocation, respectively.

27

## 1 **Results**

### 2 **Development of O-ClickFC**

3 O-ClickFC comprises three steps (Figure 1): (1) metabolic incorporation of an N<sub>3</sub>-Cho tracer  
4 into intracellular PC via endogenous pathways; (2) spatially selective labeling of N<sub>3</sub>-PC with  
5 organelle-targeting clickable dyes (OCDs); and (3) flow-cytometric measurements of fluorescently  
6 labeled lipids in target organelles. Subcellular N<sub>3</sub>-PC distribution can be spatiotemporally fixed by  
7 rapid and multiplexed organelle-selective labeling with different fluorescence wavelengths. The  
8 abundances of N<sub>3</sub>-PC in target organelles can be converted into fluorescence intensities of the  
9 corresponding OCDs, which are measurable with FACS. Thus, our method can readily provide  
10 informative snapshots of local N<sub>3</sub>-PC quantity, which allows interpretation of whether the phenotype  
11 occurs due to global abnormalities in PC synthesis or subcellular transport disorders (Figure 1).

12 O-ClickFC requires a labeling signal with high dynamic range, as well as a suitable  
13 combination of OCDs without overlapping wavelengths in FACS-based quantitative analysis. To  
14 identify the optimal OCDs, we employed nine clickable dyes with diverse spectral properties (Figure  
15 S1A) and tested their labeling capability for organelle PCs with confocal microscopy and FACS.  
16 K562 human leukemic cells, which have been widely used in genetic screening studies (To et al.,  
17 2019; Wang et al., 2015), were incubated with 10 μM N<sub>3</sub>-Cho for 1 day followed by treatment with  
18 OCDs for 15–30 min. Imaging analysis with confocal microscopy showed that, in addition to our  
19 original Rhodol-DBCO, the hydrophobic BODIPY derivatives BDP and 8AB selectively localized to  
20 the ER/Golgi and labeled N<sub>3</sub>-PC present there (Figure 2A and S1B,C). In line with our previous report  
21 (Tamura et al., 2020), cationic dyes such as RhodB, Cy3, and Cy5 derivatives selectively labeled  
22 mitochondrial PC, while membrane-impermeable Alexa Fluor (AF) 405, AF488, and AF647  
23 derivatives exclusively visualized PC in the OPM (Figure 2A and S1B,C). Flow cytometry revealed  
24 that fluorescence intensities of N<sub>3</sub>-Cho-treated cells were higher than those of non-treated cells for all  
25 OCDs (Figure 2B and S2A). The fold-change ratio, depending on the labeling efficiency and  
26 background signal from unreacted reagents after washing cells, varied with each dye and the  
27 experimental conditions (Figure 2B and S2A). We decided to use the following OCDs for single

1 labeling because they showed greater fold-changes under optimal conditions (Figure S2A–C): BDP  
2 or 8AB for the ER-Golgi, Cy3 for mitochondria, and AF405 or AF647 for the OPM. For multiplexed  
3 labeling, we chose a combination of OCDs with no spectral overlap and the highest signal-to-noise  
4 ratios [e.g. blue-emitting 8AB (Ex. 394 nm/Em. 458 nm) and red-emitting Cy3 (Ex. 555 nm/Em. 564  
5 nm) for ER-Golgi and mitochondrial labeling, respectively] (Figure S2D).

6 To evaluate the quantitative cell-separation performance of multiplexed labeling, we  
7 prepared a mixed population of cells preincubated with varying N<sub>3</sub>-Cho concentrations (0, 0.1, 1, 10  
8 μM) and carried out dual N<sub>3</sub>-PC labeling for the ER-Golgi and another organelle with corresponding  
9 OCDs. Two-color flow cytometric analysis correctly divided the bulk population into four groups  
10 with different fluorescence levels corresponding to each N<sub>3</sub>-Cho concentration (Figure S2E). These  
11 data demonstrate that O-ClickFC can separate cells on the basis of intracellular N<sub>3</sub>-PC distribution  
12 and abundance with a sufficient dynamic range (~1,000 in flow cytometric quantification).

13 We next examined whether this method could reveal subcellular phenotypes associated with  
14 genetic perturbations of PC biosynthesis. The major PC biosynthetic pathway in mammalian cells,  
15 the CDP-choline pathway, comprises three steps: (1) phosphorylation of choline catalyzed by choline  
16 kinase (CK); (2) conversion of phosphocholine to CDP-choline by CTP: phosphocholine  
17 cytidyltransferase (CCT); and (3) transfer of CDP-choline to diacylglycerol by choline  
18 phosphotransferase (CPT) in the ER and Golgi apparatus (Gibellini and Smith, 2010) (Figure S3A).  
19 CCT is the rate-limiting enzyme of this pathway, and suppression of CCT $\alpha$  (a predominant isoform  
20 of CCT) can decrease intracellular PC to inhibit cell growth (Cornell and Ridgway, 2015; Esko and  
21 Raetz, 1980). Thus, we transduced a bulk population of Cas9-expressing K562 cells with sgRNAs of  
22 *PCYT1A* encoding CCT $\alpha$  (Figure S3A) and evaluated alterations in amounts of *de novo*-synthesized  
23 N<sub>3</sub>-PC using O-ClickFC. After ER-Golgi-selective labeling, sgPCYT1A-transduced cells were  
24 divided into two populations (exhibiting bright and dim fluorescence) by flow cytometry, while  
25 control cells (without sgPCYT1A-transduction) exhibited a single bright population (Figure 2C). The  
26 population exhibiting weak fluorescence was collected by FACS and expressed a characteristic  
27 phenotype of *PCYT1A*-KO, namely, suppressed cell proliferation and synthetic defects in both natural

1 form- and N<sub>3</sub>-PC (DeLong et al., 1999) (Figure S3B-E). The same experiments were performed with  
2 mitochondria- and OPM-selective OCDs, which also showed reduced fluorescence intensity in  
3 *PCYT1A*-KO cells (Figure 2D). These results, which are consistent with previous reports of *PCYT1A*-  
4 KO causing a global decrease in PC contents of all subcellular membranes (Andrejeva et al., 2020;  
5 Esko and Raetz, 1980), successfully demonstrate the feasibility of O-ClickFC for detection of  
6 genotype-to-phenotype correlation of PC synthesis defects .

7 We subsequently examined whether this FACS-based analysis could readout PC trafficking  
8 defects. K562 cells were incubated for 5 hours with N<sub>3</sub>-Cho in the presence of brefeldin A (BFA), an  
9 inhibitor of Golgi-mediated anterograde membrane trafficking from the ER to plasma membrane  
10 (Wood et al., 1991), followed by labeling with each OCD. Fluorescence intensities of cells labeled  
11 by ER-Golgi and mitochondria OCDs were not significantly changed with BFA treatment (within ±  
12 10% of control) (Figure 2E). In stark contrast, when labeled with the OPM-staining dye, the  
13 fluorescence signal dropped by ~70% in both flow cytometry and microscopic observations of  
14 individual cells (Figure 2E and S3F), in agreement with the phenotype of BFA-induced impairment  
15 of PC transport. Notably, duplexed labeling with ER-Golgi- and OPM-OCDs yielded the same result  
16 (Figure S3G).

17 Overall, these data prove that O-ClickFC can discern and enrich cells showing deficiencies  
18 in PC synthesis and trafficking on the basis of differences in the fluorescence intensity of each  
19 organelle.

20

## 21 **Genome-scale pooled CRISPR-KO screens focusing on PC biosynthesis**

22 Having confirmed the potential ability of O-ClickFC, we sought to apply it for genome-wide  
23 CRISPR-KO screening to identify genes associated with PC biosynthesis. In our initial trial, Cas9-  
24 expressing K562 cells were transduced with the GeCKOv2 library (19,050 genes, 65,383 sgRNAs,  
25 1–3 guides/gene) (Joung et al., 2017; Sanjana et al., 2014) followed by labeling with ER-Golgi OCD  
26 (BDP-DBCO) (Figure 3A). The dimmest 1% of cells were collected by FACS and subjected to NGS  
27 analysis to rank genes according to sgRNA abundance ratio (sort/unsort) (Figure 3A,B and S4A).

1 *PCYT1A* ranked 61st (top 0.3%), indicating enrichment of genes related to PC synthesis in the  
2 collected cell population. To evaluate the validity of our screens, we selected 22 genes with known  
3 roles or potential contributions in PC synthesis (e.g., kinases, signaling proteins, and transcriptional  
4 regulators) from the top 100 genes and conducted PC labeling with cells transduced by a  
5 corresponding individual sgRNA. Here, we defined a hit gene as a gene whose knockout reduced PC  
6 labeling intensity by more than 20% in the individual validation, and four genes (*PCYT1A*, *CHEK1*,  
7 *GOLGA80*, and *AGAP4*) were verified to meet this criterion (Figure S4B). The true positive rate was  
8 low (18%) using the GeCKO v2 library, but was improved when using the more recently established  
9 Brunello library (19,114 genes, 76,441 sgRNAs): 33 out of 77 genes were assigned as hits (43% of  
10 the true positive rate) (Figure S4C). We thus decided to use the Brunello library for subsequent  
11 CRISPR-KO screening.

12           The combined 36 hits screened from GeCKO v2 and Brunello libraries are shown in Figure  
13 3C. In addition to *PCYT1A*, two known contributors to PC synthesis, *ACACA* (acetyl CoA carboxylase  
14 1) and *SLC25A1* (citrate transport protein), were found (Figure 3C). These results indicate that O-  
15 ClickFC can also identify genes involved in fatty acid synthesis. To date, the relevance of the other  
16 33 genes for PC synthesis is unknown. Given that CCT $\alpha$  activity is reversibly regulated by  
17 phosphorylation/dephosphorylation at its C-terminal serine-proline sites during the cell cycle, some  
18 sort of signaling pathways should be involved in regulation of CCT $\alpha$  activity; at present, these  
19 pathways remain unclear. Of the hit genes discovered in our screening, we were interested in *CHEK1*  
20 (coding checkpoint kinase 1, CHK1) (Figure 3C and S4B), which controls cell cycle via the  
21 CDC25A–cyclin-dependent kinase 2 (CDK2) pathway (Zhang and Hunter, 2014), and we  
22 hypothesized that it might control CCT $\alpha$  activity. In our experiments, we indeed found that PC  
23 labeling intensity was decreased by a CHK1 inhibitor (CHK1i) but was rescued by a CDK2 inhibitor  
24 (CDK2i), and hypothesized that it might control CCT $\alpha$  activity. In our experiments, we indeed found  
25 that, the PC labelling intensity was decreased by CHK1 inhibitors (CHK1i) but it was rescued by  
26 CDK2 inhibitor (CDK2i) (Jorda et al., 2018; Schuler et al., 2017) (Figure 4A). The similar effect was  
27 also observed in the *de novo* synthesis of native-form PC (Figure S5A), indicating the CHK1-



1 CDC25A-CDK2 pathway is associated with PC synthesis. We next examined whether this pathway  
2 regulates the phosphorylation states of CCT $\alpha$ . Phos-tag electrophoresis (Kinoshita et al., 2006)  
3 (Weinhold et al., 1994; Yue et al., 2020). Upon CHK1i treatment, the CCT $\alpha$  phosphorylation level in  
4 choline-free medium was significantly increased (Figure 4B, lane 2 and 3), while coincubation of  
5 CDK2i with CHK1i attenuated this effect (Figure 4B, lane 3 and 4). These data clearly reveal the  
6 regulation of CCT $\alpha$  phosphorylation states by the CHK1-CDC25A-CDK2 pathway (Figure 4C).

7 *FLVCRI* was also selected for the follow-up study because its deficiency caused a strong  
8 reduction in PC labeling and cell growth inhibition, comparable with those of *PCYT1A*-KO (Figure  
9 3C and S5C). *FLVCRI*, a member of the major facilitator superfamily (MFS), was previously  
10 identified as a plasma membrane heme exporter (Quigley et al., 2004), but its function related to PC  
11 metabolism has never been reported. MFS transporters are generally considered to transport a wide  
12 range of substrates across membranes by uniport, symport, or antiport (Quistgaard et al., 2016).  
13 Therefore, we assumed that *FLVCRI* may play an additional role as a choline importer. To confirm  
14 this, we first quantified natural choline extracted from cytoplasm using a choline oxidase-mediated  
15 coupled enzyme assay, which revealed that the loss of *FLVCRI* dramatically reduced the amount of  
16 endogenous choline inside cells (by nearly 80%) (Figure 4D). Note that these phenotypes of *FLVCRI*-  
17 KO (decrease in PC synthesis and choline uptake) are the same phenotypes associated with major  
18 choline transporter inhibition (Taylor et al., 2021). Moreover, we found that the lower PC labeling  
19 intensity in *FLVCRI*-KO cells was partially restored by re-expression of *FLVCRI* and completely  
20 rescued by overexpression of *SLC5A7* (a high affinity choline transporter specifically expressed in  
21 cholinergic neurons) (Okuda et al., 2000); whereas overexpression of *PCYT1A* had little effect (Figure  
22 4E). Moreover, recoveries in choline uptake and cell proliferation were observed in *SLC5A7*-  
23 expressing *FLVCRI*-KO cells (Figure S5D,E). These data clearly demonstrate that *FLVCRI* acts as a  
24 choline transporter in K562 cells (Figure 4F).

25

## 26 **Genome-scale pooled CRISPR screens focusing on subcellular PC trafficking**

27 We finally applied O-ClickFC to identify genes associated with subcellular PC distribution.

1 For screening focused on PC transport from the ER-Golgi to the OPM, we performed duplex labeling  
2 with two OCDs (BDP-DBCO and AF405-DBCO, respectively) in K562 cells transduced by the  
3 Brunello library (Figure 5A). Two-color flow cytometry showed the presence of a small cell  
4 population with decreased labeling intensity in the OPM, but that maintained labeling in the ER-Golgi  
5 (Figure 5B and S6A), suggesting impaired PC trafficking to the OPM. This population was clearly  
6 distinguishable from the majority population exhibiting an unchanged or decreased PC content in  
7 both the ER-Golgi and OPM. We collected the minor cell population and subjected it to the same  
8 duplex labeling-based FACS sorting again to increase selection pressure. The NGS of collected cells  
9 and gene ontology analysis indicated enrichment of genes related to intracellular transport in the top  
10 100 ranked genes. From the top 100, we selected 28 genes known or unknown to be involved in  
11 membrane transport and conducted duplex labeling in cells with individual knockouts of the selected  
12 genes. Twelve genes satisfied the following criteria: < 80% OPM-labeling and > 60% ER-Golgi  
13 labeling, most of which (eight genes) have functions related to vesicle transport and lipid transfer  
14 (Figure 5C and S6B).

15         Among them, we focused on *TMEM30A* (CDC50A), whose sgRNAs caused the lowest OPM  
16 labeling intensity (Figure 5D). In the mammalian plasma membrane, PC primarily resides in the outer  
17 leaflet, while the majority of aminophospholipids, such as phosphatidylserine (PS) and  
18 phosphatidylethanolamine (PE), are localized in the inner leaflet (Van Meer et al., 2008; Murate et  
19 al., 2015). *TMEM30A* is known to encode an essential subunit of aminophospholipid flippases that  
20 translocate PS and PE from the outer to the inner leaflet (Andersen et al., 2016; Kato et al., 2013;  
21 Segawa et al., 2014). However, it has not been reported whether the loss of *TMEM30A* function affects  
22 PC distribution in the plasma membrane bilayer, although the literature suggests an involvement of  
23 *TMEM30A* in PC flipping (Segawa et al., 2014). Thus, we investigated whether the amount of natural-  
24 form PC is reduced in the OPM of *TMEM30A*-KO cells. As with previous reports (Kato et al., 2013;  
25 Segawa et al., 2014), increased amounts of cell surface PS and PE in *TMEM30A*-KO K562 cells were  
26 observed by Annexin V and Duramycin staining (Fu et al., 2021; Suzuki et al., 2013) respectively,  
27 confirming that the phenotype is reproduced in our experimental conditions (Figure S6C). We

1 subsequently performed quantitative liquid chromatography-mass spectrometry (LC-MS) analysis  
2 combined with established membrane fractionation methods to determine PC amounts in the plasma  
3 membrane. K562 cells were incubated with a deuterated choline (choline-D9), followed by extraction  
4 of lipids from whole-cell lysate or the isolated plasma membrane bilayer. In both of these fractions,  
5 we observed negligible differences in the amount of isotope-labeled PC (PC-D9) between  
6 *TMEM30A*-KO and control cells (Figure S6D,E). These results indicate that *TMEM30A*-KO impacts  
7 neither PC biosynthesis nor total PC contents in the plasma membrane bilayer. We next evaluated the  
8 quantity of endogenous PC in the OPM by selectively extracting phospholipids in the OPM by  
9 methyl- $\alpha$ -cyclodextrin, in accordance with previous reports (Li et al., 2016). LC-MS showed a  
10 substantial decrease in endogenous PC in the OPM fraction of *TMEM30A*-KO cells compared with  
11 control cells (Figure 5E and S6F). Overall, these data reveal that *TMEM30A*-KO downregulates cell  
12 surface PC amounts, suggesting a contribution of *TMEM30A* to proper asymmetric PC distribution  
13 in the plasma membrane bilayer (Figure 5F).

14 To screen for genes implicated in mitochondrial PC transport, OCDs for the ER-Golgi and  
15 mitochondria (8AB-DBCO and Cy3-DBCO, respectively) were concurrently employed (Figure 5G).  
16 Similar to the results described above, two-dimensional flow cytometry data successfully  
17 discriminated a subpopulation emitting lower fluorescence intensity in mitochondria while  
18 maintaining it in the ER-Golgi (Figure 5H and S6G). NGS and subsequent validation using individual  
19 sgRNAs (30 genes from the top 200 ranked genes) identified four hit genes (*STARD7*, *PELO*, *HSPE1*,  
20 and *IARS2*) as potential regulators of mitochondrial PC transport (Figure 5I,J). It should be noted that  
21 *STARD7*, encoding mitochondrial StAR-related lipid transfer protein 7, was previously reported to  
22 specifically transfer PC from the ER to mitochondria via a non-vesicular system (Horibata and  
23 Sugimoto, 2010; Horibata et al., 2016; Wong et al., 2019). This result is evidence that O-ClickFC can  
24 identify genes relevant to PC transport through both vesicular transport (a major PC trafficking  
25 pathway) and monomeric diffusion mediated by PC-specific transfer proteins.

26

27

## 1 **Discussion**

2 We combined organelle-limited click labeling of phospholipids with flow cytometry to  
3 develop O-ClickFC to identify human genes involved in PC metabolism. O-ClickFC can directly  
4 measure the abundance of *de novo*-synthesized PC by FACS at organelle resolution, which allows  
5 high-throughput CRISPR screening focused on subcellular PC distribution. Compared with recent  
6 examples of FACS-based CRISPR screens using lipid metabolism reporters such as fluorescent lipid  
7 (cholesterol)-binding proteins (Lu et al., 2022), phospholipase D activity-based click labeling  
8 (Bumpus et al., 2021), or a fluorescent PC analog (Maruoka et al., 2021), O-ClickFC offers a unique  
9 and unprecedented platform to elucidate uncertain links between PC metabolism and the whole  
10 genome.

11 Several conclusions can be drawn from our O-ClickFC based CRISPR screens. Three genes  
12 known to contribute to synthesis of PC intermediate metabolites (*PCYT1A*, *ACACA*, and *SLC25A1*)  
13 were identified, demonstrating that the screen with a single ER-Golgi-OCD enabled capture of genes  
14 associated with the PC-synthetic pathway. We also found that the majority of hit genes identified as  
15 PC synthesis regulators are involved in fundamental cellular processes such as gene expression, cell  
16 cycle, and protein folding (e.g., *SRP54*, *RPL8*, and *POLR2A*; Figure 3C). Given that PC metabolism  
17 is dynamically modulated during the cell cycle (Jackowski, 1994), knockouts of these genes may  
18 impact on PC synthesis. Five genes of 12 hits obtained from the screen with ER-Golgi and OPM-  
19 OCDs are related to intracellular vesicular transport pathways (*TRAPPC2L*, *RAB5C*, *RAB11FIP4*,  
20 *RILP*, and *SEC23B*; Figure 5C). This result is consistent with the general understanding that newly  
21 synthesized PC is transported from the ER-Golgi to the plasma membrane via vesicular secretion  
22 (Van Meer et al., 2008), thus representing the robustness of O-ClickFC-based screens for PC-transport  
23 related genes. A potential limitation of O-ClickFC is that the steric hindrance of the methylazide group  
24 of N<sub>3</sub>-PC might prevent biological processes mediated by critical interactions between the choline  
25 head group of PC and proteins. However, we successfully captured *PITPNB* and *STARD7* (Figure  
26 5C,J), both of which recognize the choline head group of PC and selectively transport it between  
27 organelle membranes (Ashlin et al., 2021; Haberkant et al., 2013; Horibata and Sugimoto, 2010;

1 Vordtriede et al., 2005). Detection of these two hits indicates that the biological impact of azido group  
2 incorporation is minimal or negligible. O-ClickFC is thus feasible for screening of genes involved in  
3 non-vesicular lipid transport, as well as vesicular transport. Another concern is that the organelle  
4 selectivity of labeling by OCDs potentially depends on the physiological states of subcellular  
5 membranes to some extent, which may provide false positive/negative results – particularly for  
6 mutant cells. However, this issue can be readily verified by imaging experiments with confocal  
7 microscopy (Figure S3F), demonstrating the flexibility of O-ClickFC in terms of compatibility with  
8 both FACS and microscopic analyses. It should also be noted that genes specifically associated with  
9 sphingomyelin metabolism were not obtained in this work, even though the metabolic incorporation  
10 of azido-choline covers all choline-containing phospholipids (Jao et al., 2015). This could be  
11 explained by sphingomyelin being less abundant than PC throughout subcellular membranes (Van  
12 Meer et al., 2008), meaning fluctuations in its abundance have a smaller effect on labeling signal  
13 intensity, which is in line with our previous study (Tamura et al., 2020).

14       Among hit genes whose relationship to PC biosynthesis/transport was not known, we  
15 unveiled unexpected roles of *FLVCRI*, *CHEK1*, and *TMEM30A* in PC metabolism. *FLVCRI* has been  
16 identified as a heme exporter and has thereafter been studied in the context of heme metabolism (Khan  
17 and Quigley, 2013; Quigley et al., 2004). Here, we discovered an additional role of *FLVCRI* as a  
18 choline transporter. Choline uptake via choline transporters is essential for the survival of mammalian  
19 cells (Holmes-McNary et al., 1997). *SLC44A2*, a known choline transporter (Traiffort et al., 2013), is  
20 constitutively expressed in K562 cells (To et al., 2019), but is not required for survival (Wang et al.,  
21 2015). A set of our experimental data revealed that *FLVCRI* encodes a major transporter for the  
22 choline-uptake pathway of K562 cells and, therefore, is essential for cell proliferation (Figure 4D and  
23 S5C). *FLVCRI* is reportedly expressed in many cell types and is often associated with human disease  
24 (Quigley et al., 2004; Rajadhyaksha et al., 2010). Our findings indicate an interesting possibility that  
25 *FLVCRI* may play a broad role in PC metabolism. *CHK1* regulates cell cycle progression by  
26 phosphorylating its downstream targets (Zhang and Hunter, 2014). We demonstrated that the *CHK1*-  
27 *CDC25A*-*CDK2* pathway regulates PC synthesis via *PCYT1A* phosphorylation. It was previously

1 assumed that the carboxyl-terminal domain of PCYT1A is a potential substrate of proline-directed  
2 kinases such as CDKs (Cornell and Ridgway, 2015), which agrees well with our present results. Given  
3 that pharmacological inhibition of PC synthesis is an intriguing approach for cancer treatment  
4 (Glunde et al., 2011), our finding may open a new avenue to suppress malignant cell growth by  
5 CHK1-mediated regulation of PCYT1A activity. TMEM30A is regarded as critical for establishing  
6 the asymmetric distribution of PS but not PC (Andersen et al., 2016). We found, by using O-ClickFC,  
7 that TMEM30A could play an additional role in translocation of PC to the outer leaflet of the plasma  
8 membrane. A recent report suggested that a neuronal disease-associated mutation in flippase *ATP11A*,  
9 whose activities are regulated by TMEM30A, causes aberrant PC flipping and decreases the  
10 concentration of PC in the OPM (Segawa et al., 2021). Combined with our result, it may be proposed  
11 that malfunctions of TMEM30A cause abnormal PC distribution in the plasma membrane bilayer,  
12 leading to disorders such as neurological deterioration.

13 We expect that the O-ClickFC approach can easily be expanded to evaluate a variety of lipids,  
14 including glycerophospholipids, sphingolipids, and inositol lipids, by combination with the  
15 established metabolic incorporation of an azido group into these lipids (Garrido et al., 2015; Greaves  
16 et al., 2017; Neef and Schultz, 2009; Ricks et al., 2019). Furthermore, biomolecules other than lipids,  
17 such as proteins and glycans, for which metabolic labeling has been well studied (Dieterich et al.,  
18 2010; Saxon and Bertozzi, 2000), would in principle also be within the scope of application. We aim  
19 to unveil the genetic basis of physiological and pathological lipid metabolism by applying O-ClickFC  
20 to primary cells and model animals (Cortez et al., 2020; Fu et al., 2021). Further development of  
21 OCDs with better fluorescent properties (e.g., less spectral overlap and fluorogenic abilities) and more  
22 specific (sub)organelle membrane localizability would be beneficial to facilitate these future works.

23

1 **Materials and Methods**

2 **Key resources table**

| REAGENT or RESOURCE                                                           | SOURCE                           | IDENTIFIER          |
|-------------------------------------------------------------------------------|----------------------------------|---------------------|
| <b>Cell lines</b>                                                             |                                  |                     |
| K562                                                                          | Riken BRC                        | Cat#RBC0027         |
| LentiX™293T                                                                   | CloneTech                        | Cat#632180          |
| <b>Bacterial strains</b>                                                      |                                  |                     |
| NEB Stable Competent <i>E. coli</i> (High Efficiency)                         | New England Biolabs              | Cat#C3040           |
| <b>Culture medium</b>                                                         |                                  |                     |
| IMDM                                                                          | FUJIFILM Wako                    | Cat#098-06465       |
| Choline-free IMDM (custom made: Choline Chloride was removed)                 | Gmep                             | N/A                 |
| High K <sup>+</sup> RPMI1640 (custom made: NaCl was replaced by KCl)          | Gmep                             | N/A                 |
| DMEM                                                                          | Sigma-Aldrich                    | Cat#D6429           |
| Fetal bovine serum                                                            | Sigma-Aldrich                    | Cat#F7524           |
| Dialyzed fetal bovine serum                                                   | Gibco                            | Cat#2640044         |
| Penicillin-Streptomycin                                                       | FUJIFILM Wako                    | Cat#168-23191       |
| <b>Azidyl-compounds, organelle-specific clickable dyes, organelle markers</b> |                                  |                     |
| 1-azidoethyl-choline                                                          | Tamura et al., 2020              | N/A                 |
| Choline Chloride (Trimethyl-d9)                                               | FUJIFILM Wako                    | Cat#524-76441       |
| BDP FL DBCO                                                                   | BroadPharm                       | Cat#BP-23473        |
| 8AB-DBCO                                                                      | This study                       | N/A                 |
| Rhodol-DBCO                                                                   | Tamura et al., 2020              | N/A                 |
| AFDye 405 DBCO                                                                | Click Chemistry Tools            | Cat#1310-1          |
| DBCO-AF488                                                                    | Jena Bioscience                  | Cat#CLK1278-1       |
| DBCO-AF647                                                                    | Jena Bioscience                  | Cat#CLK1302-1       |
| RhoB-DBCO                                                                     | Tamura et al., 2020              | N/A                 |
| Cyanine3 DBCO                                                                 | Lumiprobe                        | Cat#A10F0           |
| Cy5 DBCO                                                                      | BroadPharm                       | Cat#BP-23775        |
| Cyanine5 azide                                                                | Lumiprobe                        | Cat#A3030           |
| Cyanine7 azide                                                                | Lumiprobe                        | Cat#A5030           |
| Alexa Fluor® 488 annexin V                                                    | Thermo Scientific                | Cat# V13241         |
| Duramycin-LC-Biotin                                                           | Molecular Targeting Technologies | Cat#D-1003          |
| Streptavidin, Alexa Fluor™ 647 conjugate                                      | Invitrogen                       | Cat#S32357          |
| ER-Tracker™ Red                                                               | Invitrogen                       | Cat#E34250          |
| MitoBright LT Green                                                           | Dojindo                          | Cat#342-92063       |
| DyLight488-lectin                                                             | Funakoshi                        | Cat#DL-1174         |
| DyLight649-lectin                                                             | Funakoshi                        | Cat#DL-1178-1       |
| <b>Chemicals, Inhibitors</b>                                                  |                                  |                     |
| PF-477736                                                                     | Sigma-Aldrich                    | Cat#PZ0186          |
| Cdk2 inhibitor II                                                             | Calbiochem                       | Cat#CAS 222035-13-4 |
| Brefeldin A                                                                   | FUJIFILM Wako                    | Cat#022-15991       |
| Puromycin Dihydrochloride                                                     | FUJIFILM Wako                    | Cat#160-23151       |
| Blasticidin S Hydrochloride                                                   | FUJIFILM Wako                    | Cat#029-18701       |

|                                                                          |    |                             |                    |
|--------------------------------------------------------------------------|----|-----------------------------|--------------------|
| Mesoxalonnitrile chlorophenylhydrazone                                   | 3- | FUJIFILM Wako               | Cat#0452/500       |
| Valinomycin                                                              |    | FUJIFILM Wako               | Cat#223-02391      |
| N-ethylmaleimide                                                         |    | FUJIFILM Wako               | Cat#058-02061      |
| Methyl- $\alpha$ -cyclodextrin                                           |    | AraChem                     | Cat#CDexA-076      |
| <b>Antibodies</b>                                                        |    |                             |                    |
| ATP5A (WB 1:1,000; mouse monoclonal)                                     |    | Abcam                       | Cat#ab14748        |
| $\beta$ -actin-HRP (WB 1:10,000; rabbit polyclonal)                      |    | MBL                         | Cat#PM053-7        |
| GM130 (WB 1:1,000; mouse monoclonal)                                     |    | MBL                         | Cat#PM179-3        |
| Na <sup>+</sup> /K <sup>+</sup> -ATPase (WB 1:20,000; rabbit monoclonal) |    | Abcam                       | Cat#ab76020        |
| CTA (WB 1:1,000; rabbit monoclonal)                                      |    | Abcam                       | Cat#ab109263       |
| CCT $\alpha$ (IP 1:50; rabbit monoclonal)                                |    | Cell Signaling Technologies | Cat#6931           |
| SEC61A (WB 1:1,000; rabbit monoclonal)                                   |    | Abcam                       | Cat#ab183046       |
| Mouse-HRP (WB 1:10,000; horse)                                           |    | Cell Signaling Technologies | Cat#7076           |
| Rabbit-HRP (WB 1:10,000; goat)                                           |    | Cell Signaling Technologies | Cat#7074           |
| <b>Critical commercial assays</b>                                        |    |                             |                    |
| Esp3I (BsmBI)                                                            |    | Thermo Scientific           | Cat#ER0451         |
| DNA Ligation Kit                                                         |    | Takara                      | Cat#6023           |
| ViaFect™ Transfection Reagent                                            |    | Promega                     | Cat#E4981          |
| QIAprep Spin Miniprep Kit                                                |    | QIAGEN                      | Cat#27106          |
| QIAquick Gel Extraction Kit                                              |    | QIAGEN                      | Cat#28704          |
| NucleoSpin® Blood L                                                      |    | Macherey-Nagel              | Cat#740954.20      |
| NucleoSpin® Gel and PCR Clean-up                                         |    | Macherey-Nagel              | Cat#740609.10      |
| NEBNext® High-Fidelity 2X PCR Master Mix                                 |    | New England Biolabs         | Cat#M0541L         |
| SPRIselect                                                               |    | Beckman Coulter             | Cat#B23317         |
| Dynabeads Protein A                                                      |    | Invitrogen                  | Cat#100031D        |
| Cell Counting Kit-8                                                      |    | Dojindo                     | Cat#CK04           |
| Total choline assay                                                      |    | Abcam                       | Cat#ab219944       |
| <b>Oligonucleotides</b>                                                  |    |                             |                    |
| For PCR primers, see Table S1                                            |    | FASMAC                      | N/A                |
| For sequencing primers, see Table S1                                     |    | FASMAC                      | N/A                |
| For sgRNAs, see Table S2                                                 |    | FASMAC                      | N/A                |
| <b>Plasmids</b>                                                          |    |                             |                    |
| lentiCas9-Blast                                                          |    | Zhang et al., 2014          | Addgene#52962      |
| pMD2.G                                                                   |    | Gift from Didier Trono      | Addgene#12259      |
| psPAX2                                                                   |    | Gift from Didier Trono      | Addgene#12260      |
| GeCKO v2 human library in lentiGuide-Puro                                |    | Zhang et al., 2014          | Addgene#1000000049 |
| Human sgRNA library Brunello in lentiGuide-Puro                          |    | Doench et al., 2016         | Addgene#73178      |



|                                  |                    |               |
|----------------------------------|--------------------|---------------|
| lentiGuide-Puro                  | Zhang et al., 2014 | Addgene#52963 |
| pLJM1-EGFP-PGK-mCherry           | This study         | N/A           |
| pLJM1-PCYT1A-HA-PGK-mCherry      | This study         | N/A           |
| pLJM1-FLVCR1-HA-PGK-mCherry      | This study         | N/A           |
| pLJM1-SLC5A7-HA-PGK-mCherry      | This study         | N/A           |
| <b>Software</b>                  |                    |               |
| ZEISS ZEN                        | ZEISS              | N/A           |
| Cell Sorter Software (MA900)     | Sony               | N/A           |
| Python script (for NGS analysis) | Joung et al., 2017 | N/A           |

1

## 2 **Experimental model and subject details**

### 3 Cell culture

4 K562 cells were grown in IMDM containing 10% fetal bovine serum (FBS) and 100 units/mL  
5 penicillin-streptomycin (P/S) (hereafter GM). LentiX 293T cells were grown in DMEM containing  
6 10% FBS and 100 U/mL P/S. K562 cells were used in all the assays. LentiX 293T cells were used  
7 only for lentivirus production.

8

### 9 **Methods details**

#### 10 Synthesis

11 N<sub>3</sub>-Cho, rhodol-DBCO and rhodamine B-DBCO were prepared as previously described (Tamura et  
12 al., 2020). 8AB-DBCO was synthesized according to previous report with minor modifications  
13 (Alamudi et al., 2018). Briefly, [2-[(Methylthio)(2H-pyrrol-2-ylidene)methyl]-1H-  
14 pyrrole](difluoroborane) (TCI, M2609) was reacted with dibenzocyclooctyne-amine (TCI, A2763).  
15 After purification of the crude material, product was confirmed by NMR.

16

#### 17 Metabolic incorporation of azide-choline

18 Cells were cultured in Cho-free medium (choline-free IMDM, 10% dialyzed FBS, 100 U/mL P/S)  
19 containing 0.1, 1, 10, 100 μM N<sub>3</sub>-Cho at 37°C for 5-24 hours depending on the experiments. Most of  
20 the data were obtained from the condition of incubation with 10 μM N<sub>3</sub>-Cho for 1 day unless  
21 otherwise noted.

22

#### 23 Organelle-selective labeling of N<sub>3</sub>-PC

24 After N<sub>3</sub>-Cho incorporation, cell density was adjusted to 1 x 10<sup>6</sup> cells/mL. Cells were washed with  
25 4% FBS containing IMDM and subsequently incubated with OCDs diluted in 4% FBS/IMDM with  
26 the following conditions. ER-Golgi: 100 nM BDP-DBCO, 8AB-DBCO, or Rhodol-DBCO at RT for  
27 15 mins. PM: 100 μM AF405-DBCO, AF488-DBCO, or AF647-DBCO at 15 °C for 30 mins.  
28 Mitochondria: 50 nM RhoB-DBCO, Cy3-DBCO, or Cy5-DBCO at 37 °C for 15 mins, followed by  
29 100 nM Cy5-N<sub>3</sub> (for quenching the fluorescence signal from unreacted RhoB-DBCO and Cy3-  
30 DBCO) or Cy7-N<sub>3</sub> (for quenching the fluorescence signal from unreacted Cy5-DBCO) at 37 °C for  
31 15 mins, then rinsed three times with a washing medium consisting of high K<sup>+</sup> RPMI1640, 10% FBS,  
32 50 μM mesoxalonitrile 3-chlorophenylhydrazone, and 20 μM valinomycin. After labeling, cells were  
33 washed with GM twice and resuspended in GM to 5-10 x 10<sup>5</sup> cells/mL for flow cytometry. For ER-

1 Golgi and PM labeling, cells were first labeled with AF405/647-DBCO, and then labeled with  
2 8AB/BDP-DBCO. For ER-Golgi and mitochondrial labeling, cells were first labeled with Cy3-  
3 DBCO and then labeled with 8AB-DBCO.

#### 4 5 Flow cytometric measurements of dye-labeled PC

6 Flow cytometric analysis of labeled cells was performed using Sony Cell Sorter MA900, equipped  
7 with four excitation lasers (488, 405, 561, and 638 nm) and 12-color channels. All four lasers and  
8 filters with emission BP 525/50 (Rhodol, BDP, AF488), 585/30 (RhoB, Cy3), 450/50 (8AB, AF405),  
9 and 665/30 (Cy5, AF647) were used in this study. For optimal data acquisition, 100  $\mu$ m sorting chips  
10 and following instrument settings were used: FSC threshold value: 5%; Sensor gain: FSC: 3, 525/50:  
11 33.0%, 585/30: 36.0%, 450/50: 39.0%, and 665/30: 40.5%. For each sample, at least 30,000 events  
12 were analyzed. The data acquisition, analysis, and image preparation were carried out using the  
13 instrument software MA900 Cell Sorter Software (Sony). For FACS-based cell isolation, labeled cells  
14 were sorted at 4 °C and collected into GM-containing tubes. After transfer to fresh GM, cells were  
15 cultured and subjected to further analysis.

#### 16 17 Confocal imaging of dye-labeled PC

18 Labeled cells were deposited on a 35 mm glass-base dish (IWAKI, 11-0609). Imaging of live cells  
19 was performed using a Zeiss LSM800 confocal microscope with a Zeiss Plan-Apochromat 100x/1.40  
20 oil objective. The data acquisition, analysis, and image preparation were carried out using the  
21 instrument software ZEN (ZEISS). For co-localization analysis, cells labeled with OCDs were stained  
22 with the following organelle markers: ER-Tracker Red (ER-Golgi), MitoBright LT Green  
23 (mitochondria), or DyLight488/649-lectin (PM).

#### 24 25 Plasmids

26 A list of all plasmids and sgRNAs used is provided in Appendix Table S1 and S2 (Excel file). sgRNA-  
27 expressing lentiviral plasmids were constructed by inserting 20 bp-long sgRNA oligonucleotide  
28 adjacent to the gRNA scaffold in lentiGuide-Puro as previously described (Joung et al., 2017). Briefly,  
29 lentiGuide-Puro was digested with BsmBI and 20-bp DNA fragment encoding sgRNA of interest was  
30 inserted. Appropriate overhang sequences were appended to each sgRNA sequence for cloning into  
31 the lentiGuide-Puro plasmids. For construction of protein-expressing lentiviral plasmids,  
32 complementary DNAs (cDNAs) of HA-tagged human PCYT1A, FLVCR1 and SLC5A7 (Uniprot #:  
33 P49585-1, Q9Y5Y0-1, and Q9GZV3-1 respectively) were codon optimized and synthesized by  
34 AZENTA Inc. Japan. HA-tag epitope was conjugated to the 3' end of each gene. cDNAs of PCYT1A-  
35 HA, FLVCR1-HA and SLC5A7-HA were subcloned into pLJM1-EGFP-PGK-mCherry vector  
36 backbone (a derivative of pLJM1-EGFP, Addgene #19319, where *hPGK::mCherry* was inserted)  
37 replacing EGFP with the cDNAs.

#### 38 39 Lentiviral transduction

40 Lentivirus was prepared according to previous protocol with modification (Joung et al., 2017). LentiX

1 293T cells were seeded in a 12-well plate and cultured overnight to reach 80-90% confluency. Mixture  
2 of 161  $\mu$ L OptiMEM, 4.84  $\mu$ L ViaFect, 263.5 ng pMD2.G, 585 ng psPAX2, and 765 ng sgRNA  
3 plasmid was added to 1 mL of culture medium. The supernatant was collected 48 hours post-  
4 transfection. For lentivirus production of CRISPR-KO library,  $1.8 \times 10^7$  cells were seeded on a T225  
5 flak in 45 mL of DMEM-based GM and transfected with 15.3  $\mu$ g pMD2.G, 23.4  $\mu$ g psPAX2, and  
6 30.6  $\mu$ g CRISPR library. Lentivirus was condensed to 10x concentration with LentiX Concentrator  
7 (CloneTech, 631231).

8 K562 cells were resuspended in GM containing 10  $\mu$ g/mL Polybrene and plated at a density  
9 of  $1.5 \times 10^6$  cells/mL x 2 mL/well in 12-well plate. 400  $\mu$ L of lentiviruses were added to each well,  
10 then centrifuged at 1000 x g, 33 °C, 2 hrs (spinfection). For generating stable Cas9-expressing cells,  
11 K562 cells were infected with lentiCas9-Blast lentivirus, then cultured and selected with 5  $\mu$ g/mL  
12 blasticidin S. Cas9-expressing K562 cells were infected with lentiGuide-Puro lentivirus. 24 hrs after  
13 spinfection, the cells were transferred to a 6-well plate or 10 cm dish, replacing the medium with 0.5  
14  $\mu$ g/mL Puromycin-containing GM and cultured for 4 days. The medium was replaced every two days.  
15 The cells were analyzed five days post-infection.

16

### 17 CRISPR screening

18 CRISPR screening was performed according to previous protocol with modification (Joung et al.,  
19 2017). Briefly, lentivirus of GeCKOv2 or Brunello library was used to infect  $7.8 \times 10^7$  Cas9-  
20 expressing K562 cells at an MOI < 0.3, and cells were selected with 0.5  $\mu$ g/mL puromycin. At four  
21 days post-infection, the medium was replaced with the Cho-free medium containing 10  $\mu$ M N<sub>3</sub>-Cho  
22 and incubated at 37 °C for 24 hours. Cells were labeled with BDP-DBCO (ER-Golgi screening),  
23 BDP-DBCO & AF405-DBCO (PM screening), or 8AB-DBCO & Cy3-DBCO (mitochondrial  
24 screening) as described above. Dead cells were stained with Fixable Viability Dye eFluor 780  
25 (FVD780, ThermoFisher, 65-0865-14) in ER-Golgi and PM screens. Scatter gating (FSC, BSC) was  
26 used to remove cell debris, doublet cells and dead cells, and cells with reduced fluorescence intensity  
27 in labeled PC were sorted (Figure S4A, S6A, S6E). FACS was performed at a flow rate of 5000-  
28 10000 events per second. At least  $5 \times 10^5$  cells were collected.

29

### 30 NGS analysis

31 Genomic DNA (gDNA) was isolated with NucleoSpin Blood L as the manufacturer's instructions.  
32 For 1<sup>st</sup> PCR amplification (amplification of lentiviral region in the genome), gDNAs were divided  
33 into 16 x 50  $\mu$ L reactions such that each tube contains 1000-1600 ng of gDNA. Each tube consisted  
34 of 5  $\mu$ L of 5  $\mu$ M forward and reverse (Lenti-1F and Lenti-2R respectively) primer each, 15  $\mu$ L of  
35 gDNA and water, and 25  $\mu$ L NEBNext® High-Fidelity 2X PCR Master Mix. PCR cycling conditions:  
36 an initial 3 mins at 98 °C; followed by 10 sec at 98 °C, 10 sec at 63 °C, 25 sec at 72 °C for 24 cycles,  
37 and a final 2 mins extension at 72 °C. PCR products were purified with NucleoSpin® Gel and PCR  
38 Clean-up according to the manufacturer's instructions. For 2<sup>nd</sup> PCR amplification (amplification of  
39 sgRNAs), 150-170  $\mu$ L of purified PCR products were divided into 24 x 50  $\mu$ L reactions. Each tube  
40 consisted of 5  $\mu$ L of 5  $\mu$ M forward primers (Mixture of NGS-Lib-Fwd-1 to -10), 5  $\mu$ L of 5  $\mu$ M

1 uniquely-barcoded reverse primer (from NGS-Lib-KO-Rev-MT1 to 8), 15  $\mu$ L of PCR product and  
2 water, and 25  $\mu$ L NEBNext® High-Fidelity 2X PCR Master Mix. PCR cycling conditions: an initial  
3 3 mins at 98 °C; followed by 10 sec at 98° C, 10 sec at 63 °C, 25 sec at 72 °C for 8 cycles, and a final  
4 2 mins extension at 72 °C. PCR products were purified with NucleoSpin Gel and PCR Clean-up.  
5 Amplicons (250-270 bp) were verified by 2% agarose gel electrophoresis. Samples were further  
6 purified by x0.6/1.2 double size selection using SPRIselect (Beckman Coulter, B23317), then  
7 sequenced on a Nextseq500 (Illumina), loaded with a 20% spike-in of PhiX DNA. Multiple screens  
8 were performed (ER-Golgi: two times (GeCKOv2 and Brunello); PM: one time (Brunello);  
9 mitochondria: two times (Brunello)). NGS results were analyzed according to previous Python script.  
10 The sgRNA fold change was determined for generating the gene rank data. Candidate genes in the  
11 top 100 or 200 were picked up for further verification Selected genes and sgRNAs were summarized  
12 in Table S2.

13

#### 14 Individual testing of candidate genes

15 Cas9-expressing K562 cells were infected with 400  $\mu$ L of sgRNA lentivirus (lentiGuide-Puro, Table  
16 S2) per well as described above. Cells were then cultured with 0.5  $\mu$ g/mL puromycin for four days.  
17 sgControl-transduced cells were stained with 1  $\mu$ M CPM (7-Diethylamino-3-(4'-Maleimidylphenyl)-  
18 4-Methylcoumarin, ThermoFisher, used for cell identification in flow cytometric assay) diluted in  
19 serum-free IMDM at 37 °C for 15 mins, and washed with GM twice. CPM-labeled (nontargeting  
20 control) and unlabeled (CRISPR-KO) cells were then mixed in 1:1 ratio, and cultured in 10  $\mu$ M N<sub>3</sub>-  
21 Cho containing Cho-free medium at 1 x 10<sup>6</sup> cells/mL density for 24 hrs. On the following day, cells  
22 were labeled with OCDs, then analyzed with the flow cytometer. For confirmation of OPM labeling  
23 in TMEM30A-KO cells, AF405-DBCO was also used without CPM labeling. Median fluorescence  
24 intensity (MFI) was used to compare N<sub>3</sub>-PC levels between control and CRISPR-KO cells. Two or  
25 more distinct sgRNAs targeting the same gene that displayed <80% ER-Golgi N<sub>3</sub>-PC for ER-Golgi  
26 screen, >60% ER-Golgi N<sub>3</sub>-PC and <80% PM N<sub>3</sub>-PC for PM screen, or >60% ER-Golgi and <80%  
27 mitochondrial N<sub>3</sub>-PC for the mitochondrial screen compared to nontargeting control sgRNA were  
28 considered as hits. Protein functions of hit genes were described according to UniProt database.

29

#### 30 FLVCR1-KO rescue assay

31 Cas9-expressing K562 cells were infected with sgControl or sgFLVCR1 lentivirus as described above.  
32 After four days post-transduction, FLVCR1-KO cells were incubated with N<sub>3</sub>-Cho for 1 day, labeled  
33 with BDP-DBCO, and cells with fluorescence intensities between 10<sup>3</sup> and 10<sup>4</sup> (dim population) were  
34 isolated by FACS. Control cells were infected with lentivirus expressing mCherry and GFP, and the  
35 isolated FLVCR1-KO cells were infected with lentivirus expressing mCherry together with GFP,  
36 PCYT1-HA, FLVCR1-HA, or SLC5A7-HA. After three days culture, cells were again treated with  
37 N<sub>3</sub>-Cho for 1 day and labeled with 8AB-DBCO. mCherry-positive cell population (MFI of mCherry  
38 >10<sup>3</sup>) was subjected to flow cytometric measurement of 8AB-labeled PC. For bulk-cell analysis of  
39 FLVCR1-KO subpopulation with recovery in N<sub>3</sub>-PC labeling, mCherry-positive and 8AB-positive  
40 cells (MFI: mCherry >10<sup>3</sup>, 8AB >10<sup>4</sup>) were isolated by FACS and subjected to total choline assay

1 and cell growth assay.

2

### 3 LC-MS/MS analysis of phospholipids

4 For PC-D9 analysis, cells were incubated in Cho-free medium containing 10  $\mu$ M ChoD9 at 37 °C for  
5 24 hrs at 1 x 10<sup>6</sup> cells/mL. Lipids were extracted by the Bligh & Dyer method and were subjected to  
6 LC-MS/MS analysis using LC-30AD HPLC system (Shimadzu) coupled to triple-quadrupole LCMS-  
7 8040 mass spectrometer (Shimadzu) as previously described (Tamura et al., 2020). The precursor  
8 ions of m/z 184 and 193 were monitored for detection of PC and PC-D9 (positive ion mode),  
9 respectively. The total ion current chromatogram of PC and PC-D9 was recorded to quantify PC-D9  
10 content (presented as percentage of PC-D9 in total of PC and PC-D9). For extraction of phospholipids  
11 in the outer leaflet of the plasma membrane (Li et al., 2016), 1 x 10<sup>7</sup> cells were incubated in PBS  
12 containing 40 mM methyl- $\alpha$ -cyclodextrin (AraChem) and 1.5 mM 1,2-dioleoyl-sn-glycero-3-  
13 phospho-(1'-rac-glycerol) (DOPG, Avanti) for 1 hour at RT. After centrifuging, the supernatant was  
14 collected and subjected to lipid extraction and LC-MS/MS analysis. PE was detected by neutral loss  
15 scanning of m/z 141 (positive ion mode). Amount of PC or PE was quantified as total intensities of  
16 choline- or ethanolamine-containing lipid species detected in the range of m/z 590-940, respectively.

17

### 18 LC-MS/MS analysis of phosphorylated PCYT1A

19 1 x 10<sup>6</sup> K562 cells cultured in GM were collected and lysed with Cell Extraction Buffer (Invitrogen,  
20 FNN0011) with protease inhibitor (1x protease inhibitor complete, 1mM PMSF). PCYT1A was  
21 immunoprecipitated according to the manufacturer's instruction using 100  $\mu$ L Dynabeads Protein A  
22 with 2  $\mu$ g of anti-CCTA antibody (CST) per purification. Beads were resuspended in 100  $\mu$ L of 100  
23 mM Tris pH 8.0 buffer. 500 ng of Trypsin/Lys-C Mix was added and incubated at 37 °C O/N,  
24 centrifuged and the supernatant was transferred to new tubes. Peptides were reduced by DTT,  
25 alkylated by iodoacetic acid. Alkylation was stopped by cysteine, then desalted by C18 ZipTip.  
26 Peptides were then subjected to nanoLC-MS analysis using the UltiMate 3000 RSLCnano LC System  
27 (ThermoFisher). Mobile phase A: 0.1% formic acid and B: 0.1% formic acid in 80% acetonitrile.  
28 Mobile phase gradient: 2% B at 0 min, 5% B at 4 min, 32% B at 74 min, and 65% B at 84 min. Flow  
29 rate: 750 nl/min at 0–4 min, 200 nl/min at 4–84 min. Peptide eluents were analyzed by Q Exactive  
30 HF-X (Thermo Scientific). Acquired data were processed with PEAKS Studio (Bioinformatics  
31 Solutions Inc). The phosphorylation sites identified in this analysis were compared with the UniProt  
32 database (ID: P49585).

33

### 34 Pharmacological treatment

35 For inhibition of CHK1 and CDK2, K562 cells were cultured in Cho-free medium at 1.0 x 10<sup>6</sup>  
36 cells/mL density with 10  $\mu$ M N<sub>3</sub>-Cho and following inhibitors at the given concentration at 37 °C for  
37 24 hrs. CHK1 inhibitor: 1  $\mu$ M PF-477736; CDK2 inhibitor: 10  $\mu$ M Cdk2 inhibitors II. Cells were  
38 then labeled with BDP-DBCO and subjected to flow cytometric analysis. For PC-D9 quantification,  
39 cells were first cultured with inhibitors in Cho-free medium at 37 °C for 24 hours, and then treated  
40 with ChoD9, followed by LC-MS/MS analysis. For inhibition of PM trafficking, cells were first

1 cultured in Cho-free medium at  $1.0 \times 10^6$  cells/mL O/N, then treated with  $10 \mu\text{M}$   $\text{N}_3\text{-Cho}$  and  $10 \mu\text{M}$   
2 Brefeldin A (BFA) at  $37^\circ\text{C}$  for 5 hrs. After the incubation, cells were labeled with OCDs, then  
3 analyzed with flow cytometry and microscopy.

#### 4 5 Flow cytometric analysis of cell surface PS and PE

6 For assessing PS on cell surface, cells were washed with Annexin binding buffer (Invitrogen, V13246)  
7 once, labeled with AF488-Annexin V diluted in Annexin buffer (1:20) at RT for 15 mins, followed  
8 by a one-time wash with Annexin buffer, then analyzed with flow cytometry. For assessing PE, cells  
9 were washed with 0.5% fatty acid (FA)-free BSA/PBS (Wako) once, labeled with  $45 \mu\text{M}$  Duramycin-  
10 LC-Biotin/Streptavidin-647 pre-conjugated complex (1:50) diluted in 0.5% Fatty Acid-free BSA/PBS  
11 at  $15^\circ\text{C}$  for 15 mins, followed by a one-time wash with 0.5% FA-free/PBS, then analyzed with flow  
12 cytometry.

#### 13 14 Cell growth assay

15 2500 cells were inoculated on a 96-well plate per well and cultured for 24-48 hours. Cell Counting  
16 Kit-8 was added into each well (10  $\mu\text{L}$  per 100  $\mu\text{L}$  medium) and incubated at  $37^\circ\text{C}$  for 1 hour. The  
17 absorbance at 450 nm was measured with a plate reader (TECAN, Infinite 200 PRO).

#### 18 19 GPMV isolation

20 GPMVs were prepared according to previous study with modification (Sezgin et al., 2012). Briefly,  
21 ChoD9 treated K562 cells were washed with GPMV buffer (10 mM HEPES, 150 mM NaCl, 2 mM  
22  $\text{CaCl}_2$ , pH 7.4), then incubated in 2 mM N-ethylmaleimide/GPMV buffer at  $37^\circ\text{C}$  for 1 hour allowing  
23 the cells to produce a sufficient amount of GPMVs. Supernatants containing GPMVs were collected,  
24 centrifuged at  $1,000 \times g$  for 2 mins to remove cells, followed by  $16,000 \times g$  for 10 mins to sediment  
25 GPMVs. Collected GPMVs were subjected to western blotting or LC-MS/MS analyses.

#### 26 27 SDS-PAGE and western blotting

28 K562 cells or GPMVs were lysed in Cell Extraction Buffer with protease inhibitor (1x protease  
29 inhibitor complete, 1 mM PMSF). 20  $\mu\text{g}$  of lysate was run on SDS-PAGE gels (BIO-RAD, 4561095)  
30 or on Phos-Tag SDS-PAGE gel (10%, Wako, 193-16711). Phos-Tag gels were incubated in transfer  
31 buffer containing 1 mM EDTA for 10 min, and then soaked in normal transfer buffer for 10 min.  
32 Proteins were transferred to a PVDF membrane and standard western blotting procedures were  
33 subsequently followed.

#### 34 35 Total choline assay

36 Total choline assay was performed according to the manufacturer's instruction. Briefly,  $5 \times 10^5$  cells  
37 were lysed with 200  $\mu\text{L}$  of the provided Assay Buffer, and 2 x 50  $\mu\text{L}$  were used for the assay in a 96-  
38 well plate. 50  $\mu\text{L}$  Choline reaction mix was added into each sample, then incubated at RT for 30 mins  
39 in the dark. The amount of Choline was quantitated with a fluorescence microplate reader (TECAN,  
40 Infinite® 200 PRO) at Ex./Em. = 540/590 nm.

1

2 Statistical analysis

3 Bar graphs were represented as mean  $\pm$  SEM. Heatmaps and dot plots in individual testing of genes  
4 and sgRNAs were generated by taking mean of the data. Number of data point per group was indicated  
5 in the figures or figure legends. Statistical analyses were performed using a two-way unpaired t-test.  
6

## 1 **Acknowledgments**

2           The authors would like thank K. Uchida, A. Fujisawa, K. Kunieda, and H. Nonaka for  
3 chemical synthesis; and T. Kondo, Y Sando, and the NGS Core Facility of the Kyoto University  
4 Graduate Schools of Biostudies for NGS analysis. MS analysis of protein was performed at the  
5 Kazusa DNA Research Institute. We thank Edanz (<https://jp.edanz.com/ac>) for editing a draft of this  
6 manuscript. This work was supported by a Grant-in-Aid for Scientific Research on Innovative Areas  
7 “Chemistry for Multimolecular Crowding Biosystems” (JSPS KAKENHI Grant 17H06348), the  
8 Japan Science and Technology Agency (JST) ERATO Grant JPMJER1802 to I.H.; a Grant-in-Aid for  
9 Scientific Research on Innovative Areas ‘Integrated Bio-metal Science’ (19H05764), Scientific  
10 Research (B) (21H02058) to T.T.; and a Grant-in-Aid for Early-Career Scientists (19K16075), JST  
11 PRESTO Grant JPMJPR20EA to M.T.

12

## 13 **Author contributions**

14           M.T., T.T., and I.H. conceived the project and designed the experiments. M.T. and N.T.  
15 performed the experiments and data analysis. K.N. supervised the MS analysis of lipid. M.T., N.T.,  
16 T.T., and I.H. wrote the manuscript with input from all authors.

17

## 18 **Declaration of interests**

19           The authors declare no competing interests.

20

21

22



## 1 **References**

- 2 Alamudi, S.H., Su, D., Lee, K.J., Lee, J.Y., Belmonte-Vázquez, J.L., Park, H.S., Peña-Cabrera, E.,  
3 and Chang, Y.T. (2018). A palette of background-free tame fluorescent probes for intracellular multi-  
4 color labelling in live cells. *Chem. Sci.* *9*, 2376–2383.
- 5
- 6 Andersen, J.P., Vestergaard, A.L., Mikkelsen, S.A., Mogensen, L.S., Chalal, M., and Molday, R.S.  
7 (2016). P4-ATPases as phospholipid flippases-structure, function, and enigmas. *Front. Physiol.* *7*.
- 8
- 9 Andrejeva, G., Gowan, S., Lin, G., Wong Te Fong, A.C.L., Shamsaei, E., Parkes, H.G., Mui, J.,  
10 Raynaud, F.I., Asad, Y., Vizcay-Barrena, G., et al. (2020). De novo phosphatidylcholine synthesis is  
11 required for autophagosome membrane formation and maintenance during autophagy. *Autophagy* *16*,  
12 1044–1060.
- 13
- 14 Ashlin, T.G., Blunsom, N.J., and Cockcroft, S. (2021). Courier service for phosphatidylinositol:  
15 PITPs deliver on demand. *Biochim. Biophys. Acta - Mol. Cell Biol. Lipids* *1866*.
- 16
- 17 Atkinson, K.D., Jensen, B., Kolat, A.I., Storm, E.M., Henry, S.A., and Fogel, S. (1980). Yeast mutants  
18 auxotrophic for choline or ethanolamine. *J. Bacteriol.* *141*, 558–564.
- 19
- 20 Bumpus, T.W., Huang, S., Tei, R., and Baskin, J.M. (2021). Click chemistry-enabled CRISPR  
21 screening reveals GSK3 as a regulator of PLD signaling. *Proc. Natl. Acad. Sci. U. S. A.* *118*.
- 22
- 23 Cornell, R.B., and Ridgway, N.D. (2015). CTP:phosphocholine cytidyltransferase: Function,  
24 regulation, and structure of an amphitropic enzyme required for membrane biogenesis. *Prog. Lipid*  
25 *Res.* *59*, 147–171.
- 26
- 27 Cortez, J.T., Montauti, E., Shifrut, E., Gatchalian, J., Zhang, Y., Shaked, O., Xu, Y., Roth, T.L.,  
28 Simeonov, D.R., Zhang, Y., et al. (2020). CRISPR screen in regulatory T cells reveals modulators of  
29 Foxp3. *Nature* *582*, 416–420.
- 30
- 31 DeLong, C.J., Shen, Y.J., Thomas, M.J., and Cui, Z. (1999). Molecular distinction of  
32 phosphatidylcholine synthesis between the CDP- choline pathway and phosphatidylethanolamine  
33 methylation pathway. *J. Biol. Chem.* *274*, 29683–29688.
- 34
- 35 Dieterich, D.C., Hodas, J.J.L., Gouzer, G., Shadrin, I.Y., Ngo, J.T., Triller, A., Tirrell, D.A., and  
36 Schuman, E.M. (2010). In situ visualization and dynamics of newly synthesized proteins in rat  
37 hippocampal neurons. *Nat. Neurosci.* *13*, 897–905.
- 38
- 39 Esko, J.D., and Raetz, C.R. (1980). Autoradiographic detection of animal cell membrane mutants  
40 altered in phosphatidylcholine synthesis. *Proc. Natl. Acad. Sci. U. S. A.* *77*, 5192–5196.

- 1  
2 Fu, G., Guy, C.S., Chapman, N.M., Palacios, G., Wei, J., Zhou, P., Long, L., Wang, Y.D., Qian, C.,  
3 Dhungana, Y., et al. (2021). Metabolic control of TFH cells and humoral immunity by  
4 phosphatidylethanolamine. *Nature* *595*, 724–729.
- 5  
6 Garrido, M., Abad, J.L., Fabriàs, G., Casas, J., and Delgado, A. (2015). Azide-tagged sphingolipids:  
7 New tools for metabolic flux analysis. *ChemBioChem* *16*, 641–650.
- 8  
9 Gibellini, F., and Smith, T.K. (2010). The Kennedy pathway-de novo synthesis of  
10 phosphatidylethanolamine and phosphatidylcholine. *IUBMB Life* *62*, 414–428.
- 11  
12 Glunde, K., Bhujwala, Z.M., and Ronen, S.M. (2011). Choline metabolism in malignant  
13 transformation. *Nat. Rev. Cancer* *11*, 835–848.
- 14  
15 Greaves, J., Munro, K.R., Davidson, S.C., Riviere, M., Wojno, J., Smith, T.K., Tomkinson, N.C.O.,  
16 and Chamberlain, L.H. (2017). Molecular basis of fatty acid selectivity in the zDHHC family of S-  
17 acyltransferases revealed by click chemistry. *Proc. Natl. Acad. Sci. U. S. A.* *114*, E1365–E1374.
- 18  
19 Haberkant, P., Raijmakers, R., Wildwater, M., Sachsenheimer, T., Brügger, B., Maeda, K.,  
20 Houweling, M., Gavin, A.C., Schultz, C., Van Meer, G., et al. (2013). In vivo profiling and  
21 visualization of cellular protein-lipid interactions using bifunctional fatty acids. *Angew. Chemie - Int.*  
22 *Ed.* *52*, 4033–4038.
- 23  
24 Harayama, T., and Riezman, H. (2018). Understanding the diversity of membrane lipid composition.  
25 *Nat. Rev. Mol. Cell Biol.* *19*, 281–296.
- 26  
27 Holmes-Mcnary, M.Q., Loy, R., Mar, M.H., Albright, C.D., and Zeisel, S.H. (1997). Apoptosis is  
28 induced by choline deficiency in fetal brain and in PC12 cells. *Dev. Brain Res.* *101*, 9–16.
- 29  
30 Hoover-Fong, J., Sobreira, N., Jurgens, J., Modaff, P., Blout, C., Moser, A., Kim, O.H., Cho, T.J.,  
31 Cho, S.Y., Kim, S.J., et al. (2014). Mutations in PCYT1A, encoding a key regulator of  
32 phosphatidylcholine metabolism, cause spondylometaphyseal dysplasia with cone-rod dystrophy.  
33 *Am. J. Hum. Genet.* *94*, 105–112.
- 34  
35 Horibata, Y., and Sugimoto, H. (2010). StarD7 mediates the intracellular trafficking of  
36 phosphatidylcholine to mitochondria. *J. Biol. Chem.* *285*, 7358–7365.
- 37  
38 Horibata, Y., Ando, H., Zhang, P., Vergnes, L., Aoyama, C., Itoh, M., Reue, K., and Sugimoto, H.  
39 (2016). StarD7 protein deficiency adversely affects the phosphatidylcholine composition, respiratory  
40 activity, and cristae structure of mitochondria. *J. Biol. Chem.* *291*, 24880–24891.

- 1  
2 Jackowski, S. (1994). Coordination of membrane phospholipid synthesis with the cell cycle. *J. Biol. Chem.* *269*, 3858–3867.  
3  
4  
5 Jao, C.Y., Roth, M., Welti, R., and Salic, A. (2015). Biosynthetic labeling and two-color imaging of  
6 phospholipids in cells. *ChemBioChem* *16*, 472–476.  
7  
8 Jorda, R., Hendrychová, D., Voller, J., Řezníčková, E., Gucký, T., and Kryštof, V. (2018). How  
9 Selective Are Pharmacological Inhibitors of Cell-Cycle-Regulating Cyclin-Dependent Kinases? *J.*  
10 *Med. Chem.* *61*, 9105–9120.  
11  
12 Joung, J., Konermann, S., Gootenberg, J.S., Abudayyeh, O.O., Platt, R.J., Brigham, M.D., Sanjana,  
13 N.E., and Zhang, F. (2017). Genome-scale CRISPR-Cas9 knockout and transcriptional activation  
14 screening. *Nat. Protoc.* *12*, 828–863.  
15  
16 Kato, U., Inadome, H., Yamamoto, M., Emoto, K., Kobayashi, T., and Umeda, M. (2013). Role for  
17 phospholipid flippase complex of ATP8A1 and CDC50A proteins in cell migration. *J. Biol. Chem.*  
18 *288*, 4922–4934.  
19  
20 Khan, A.A., and Quigley, J.G. (2013). Heme and FLVCR-related transporter families SLC48 and  
21 SLC49. *Mol. Aspects Med.* *34*, 669–682.  
22  
23 Kinoshita, E., Kinoshita-Kikuta, E., Takiyama, K., and Koike, T. (2006). Phosphate-binding tag, a  
24 new tool to visualize phosphorylated proteins. *Mol. Cell. Proteomics* *5*, 749–757.  
25  
26 Li, G., Kim, J., Huang, Z., St Clair, J.R., Brown, D.A., and London, E. (2016). Efficient replacement  
27 of plasma membrane outer leaflet phospholipids and sphingolipids in cells with exogenous lipids.  
28 *Proc. Natl. Acad. Sci. U. S. A.* *113*, 14025–14030.  
29  
30 Lu, A., Hsieh, F., Sharma, B.R., Vaughn, S.R., Enrich, C., and Pfeffer, S.R. (2022). CRISPR screens  
31 for lipid regulators reveal a role for ER-bound SNX13 in lysosomal cholesterol export. *J. Cell Biol.*  
32 *221*.  
33  
34 Maruoka, M., Zhang, P., Mori, H., Imanishi, E., Packwood, D.M., Harada, H., Kosako, H., and Suzuki,  
35 J. (2021). Caspase cleavage releases a nuclear protein fragment that stimulates phospholipid  
36 scrambling at the plasma membrane. *Mol. Cell* *81*, 1397-1410.e9.  
37  
38 Van Meer, G., Voelker, D.R., and Feigenson, G.W. (2008). Membrane lipids: Where they are and  
39 how they behave. *Nat. Rev. Mol. Cell Biol.* *9*, 112–124.  
40

- 1 Mitsuhashi, S., Ohkuma, A., Talim, B., Karahashi, M., Koumura, T., Aoyama, C., Kurihara, M.,  
2 Quinlivan, R., Sewry, C., Mitsuhashi, H., et al. (2011). A congenital muscular dystrophy with  
3 mitochondrial structural abnormalities caused by defective de novo phosphatidylcholine biosynthesis.  
4 *Am. J. Hum. Genet.* *88*, 845–851.
- 5
- 6 Murate, M., Abe, M., Kasahara, K., Iwabuchi, K., Umeda, M., and Kobayashi, T. (2015).  
7 Transbilayer distribution of lipids at nano scale. *J. Cell Sci.* *128*, 1627–1638.
- 8
- 9 Neef, A.B., and Schultz, C. (2009). Selective fluorescence labeling of lipids in living cells. *Angew.*  
10 *Chemie - Int. Ed.* *48*, 1498–1500.
- 11
- 12 Okuda, T., Haga, T., Kanai, Y., Endou, H., Ishihara, T., and Katsura, I. (2000). Identification and  
13 characterization of the high-affinity choline transporter. *Nat. Neurosci.* *3*, 120–125.
- 14
- 15 Payne, F., Lim, K., Girousse, A., Brown, R.J., Kory, N., Robbins, A., Xue, Y., Sleight, A., Cochran,  
16 E., Adams, C., et al. (2014). Mutations disrupting the Kennedy phosphatidylcholine pathway in  
17 humans with congenital lipodystrophy and fatty liver disease. *Proc. Natl. Acad. Sci. U. S. A.* *111*,  
18 8901–8906.
- 19
- 20 Quigley, J.G., Yang, Z., Worthington, M.T., Phillips, J.D., Sabo, K.M., Sabath, D.E., Berg, C.L.,  
21 Sassa, S., Wood, B.L., and Abkowitz, J.L. (2004). Identification of a human heme exporter that is  
22 essential for erythropoiesis. *Cell* *118*, 757–766.
- 23
- 24 Quistgaard, E.M., Löw, C., Guettou, F., and Nordlund, P. (2016). Understanding transport by the  
25 major facilitator superfamily (MFS): Structures pave the way. *Nat. Rev. Mol. Cell Biol.* *17*, 123–132.
- 26
- 27 Rajadhyaksha, A.M., Elemento, O., Puffenberger, E.G., Schierberl, K.C., Xiang, J.Z., Putorti, M.L.,  
28 Berciano, J., Poulin, C., Brais, B., Michaelides, M., et al. (2010). Mutations in FLVCR1 cause  
29 posterior column ataxia and retinitis pigmentosa. *Am. J. Hum. Genet.* *87*, 643–654.
- 30
- 31 Ricks, T.J., Cassilly, C.D., Carr, A.J., Alves, D.S., Alam, S., Tschersch, K., Yokley, T.W., Workman,  
32 C.E., Morrell-Falvey, J.L., Barrera, F.N., et al. (2019). Labeling of Phosphatidylinositol Lipid  
33 Products in Cells through Metabolic Engineering by Using a Clickable myo-Inositol Probe.  
34 *ChemBioChem* *20*, 172–180.
- 35
- 36 Ridgway, N.D. (2013). The role of phosphatidylcholine and choline metabolites to cell proliferation  
37 and survival. *Crit. Rev. Biochem. Mol. Biol.* *48*, 20–38.
- 38
- 39 Sanjana, N.E., Shalem, O., and Zhang, F. (2014). Improved vectors and genome-wide libraries for  
40 CRISPR screening. *Nat. Methods* *11*, 783–784.

- 1  
2 Saxon, E., and Bertozzi, C.R. (2000). Cell surface engineering by a modified Staudinger reaction.  
3 *Science* (80-. ). 287, 2007–2010.  
4  
5 Schneiter, R., Brügger, B., Sandhoff, R., Zellnig, G., Leber, A., Lampl, M., Athenstaedt, K., Hrastnik,  
6 C., Eder, S., Daum, G., et al. (1999). Electrospray ionization tandem mass spectrometry (ESI-  
7 MS/MS) analysis of the lipid molecular species composition of yeast subcellular membranes reveals  
8 acyl chain-based sorting/remodeling of distinct molecular species en route to the plasma membrane.  
9 *J. Cell Biol.* 146, 741–754.  
10  
11 Schuler, F., Weiss, J.G., Lindner, S.E., Lohmüller, M., Herzog, S., Spiegl, S.F., Menke, P., Geley, S.,  
12 Labi, V., and Villunger, A. (2017). Checkpoint kinase 1 is essential for normal B cell development  
13 and lymphomagenesis. *Nat. Commun.* 8, 1–12.  
14  
15 Segawa, K., Kurata, S., Yanagihashi, Y., Brummelkamp, T.R., Matsuda, F., and Nagata, S. (2014).  
16 Caspase-mediated cleavage of phospholipid flippase for apoptotic phosphatidylserine exposure.  
17 *Science* (80-. ). 344, 1164–1168.  
18  
19 Segawa, K., Kikuchi, A., Noji, T., Sugiura, Y., Hiraga, K., Suzuki, C., Haginoya, K., Kobayashi, Y.,  
20 Matsunaga, M., Ochiai, Y., et al. (2021). A sublethal ATP11A mutation associated with neurological  
21 deterioration causes aberrant phosphatidylcholine flipping in plasma membranes. *J. Clin. Invest.* 131.  
22  
23 Sezgin, E., Kaiser, H.J., Baumgart, T., Schwille, P., Simons, K., and Levental, I. (2012). Elucidating  
24 membrane structure and protein behavior using giant plasma membrane vesicles. *Nat. Protoc.* 7,  
25 1042–1051.  
26  
27 Shalem, O., Sanjana, N.E., and Zhang, F. (2015). High-throughput functional genomics using  
28 CRISPR-Cas9. *Nat. Rev. Genet.* 16, 299–311.  
29  
30 Suzuki, J., Denning, D.P., Imanishi, E., Horvitz, H.R., and Nagata, S. (2013). Xk-related protein 8  
31 and CED-8 promote phosphatidylserine exposure in apoptotic cells. *Science* (80-. ). 341, 403–406.  
32  
33 Tamura, T., Fujisawa, A., Tsuchiya, M., Shen, Y., Nagao, K., Kawano, S., Tamura, Y., Endo, T.,  
34 Umeda, M., and Hamachi, I. (2020). Organelle membrane-specific chemical labeling and dynamic  
35 imaging in living cells. *Nat. Chem. Biol.* 16, 1361–1367.  
36  
37 Taylor, A., Grapentine, S., Ichhpuniani, J., and Bakovic, M. (2021). Choline transporter-like proteins  
38 1 and 2 are newly identified plasma membrane and mitochondrial ethanolamine transporters. *J. Biol.*  
39 *Chem.* 296.  
40

- 1 To, T.L., Cuadros, A.M., Shah, H., Hung, W.H.W., Li, Y., Kim, S.H., Rubin, D.H.F., Boe, R.H., Rath,  
2 S., Eaton, J.K., et al. (2019). A Compendium of Genetic Modifiers of Mitochondrial Dysfunction  
3 Reveals Intra-organelle Buffering. *Cell* *179*, 1222-1238.e17.  
4
- 5 Traiffort, E., O'Regan, S., and Ruat, M. (2013). The choline transporter-like family SLC44:  
6 Properties and roles in human diseases. *Mol. Aspects Med.* *34*, 646–654.  
7
- 8 Vance, J.E. (2015). Phospholipid Synthesis and Transport in Mammalian Cells. *Traffic* *16*, 1–18.  
9
- 10 van der Veen, J.N., Kennelly, J.P., Wan, S., Vance, J.E., Vance, D.E., and Jacobs, R.L. (2017). The  
11 critical role of phosphatidylcholine and phosphatidylethanolamine metabolism in health and disease.  
12 *Biochim. Biophys. Acta - Biomembr.* *1859*, 1558–1572.  
13
- 14 Vordtriede, P.B., Doan, C.N., Tremblay, J.M., Helmkamp, G.M., and Yoder, M.D. (2005). Structure  
15 of PITP $\beta$  in complex with phosphatidylcholine: Comparison of structure and lipid transfer to other  
16 PITP isoforms. *Biochemistry* *44*, 14760–14771.  
17
- 18 Wang, T., Birsoy, K., Hughes, N.W., Krupczak, K.M., Post, Y., Wei, J.J., Lander, E.S., and Sabatini,  
19 D.M. (2015). Identification and characterization of essential genes in the human genome. *Science*  
20 (80-. ). *350*, 1096–1101.  
21
- 22 Weinhold, P.A., Charles, L., and Feldman, D.A. (1994). Regulation of CTP: Phosphocholine  
23 cytidylyltransferase in HepG2 cells: Effect of choline depletion on phosphorylation, translocation and  
24 phosphatidylcholine levels. *Biochim. Biophys. Acta (BBA)/Lipids Lipid Metab.* *1210*, 335–347.  
25
- 26 Wong, L.H., Gatta, A.T., and Levine, T.P. (2019). Lipid transfer proteins: the lipid commute via  
27 shuttles, bridges and tubes. *Nat. Rev. Mol. Cell Biol.* *20*, 85–101.  
28
- 29 Wood, S.A., Park, J.E., and Brown, W.J. (1991). Brefeldin A causes a microtubule-mediated fusion  
30 of the trans-Golgi network and early endosomes. *Cell* *67*, 591–600.  
31
- 32 Yue, L., McPhee, M.J., Gonzalez, K., Charman, M., Lee, J., Thompson, J., Winkler, D.F.H., Cornell,  
33 R.B., Pelech, S., and Ridgway, N.D. (2020). Differential dephosphorylation of CTP:Phosphocholine  
34 cytidylyltransferase upon translocation to nuclear membranes and lipid droplets. *Mol. Biol. Cell* *31*,  
35 1047–1059.  
36
- 37 Zhang, Y., and Hunter, T. (2014). Roles of Chk1 in cell biology and cancer therapy. *Int. J. Cancer*  
38 *134*, 1013–1023.  
39  
40

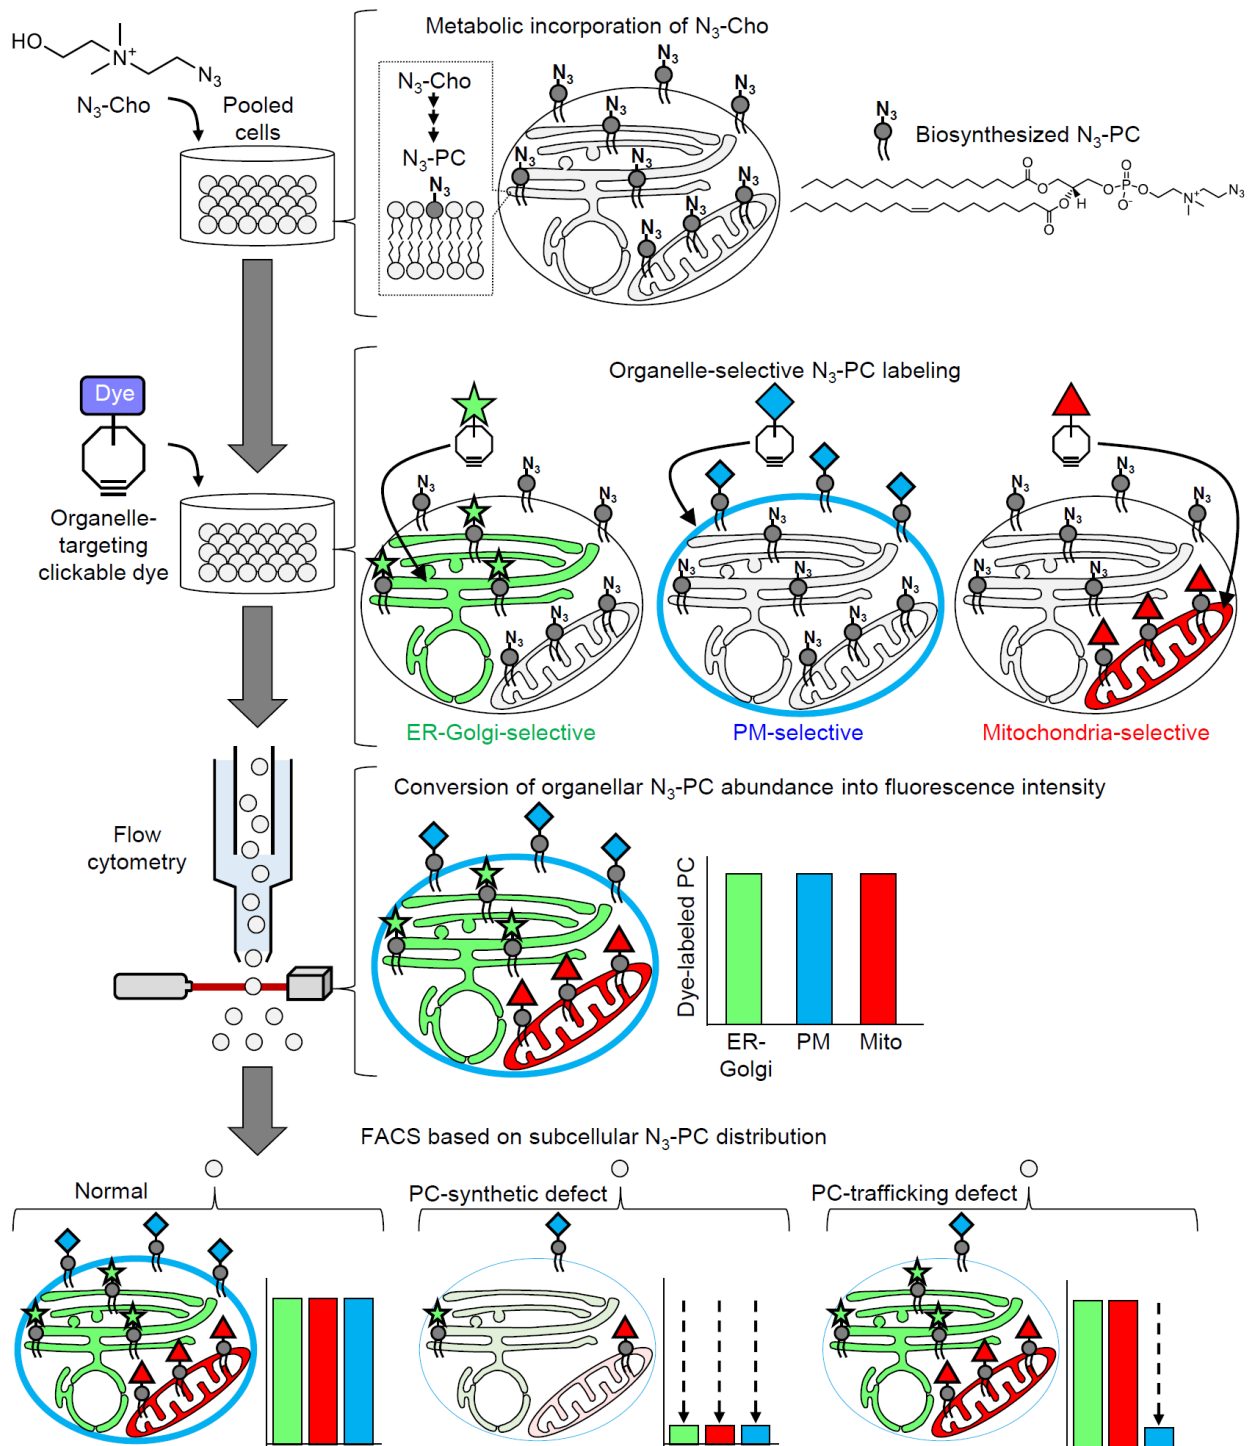

1

2 **Figure 1. Workflow for flow cytometric analysis of subcellular PC distribution.**  $N_3$ -Cho is metabolically  
3 incorporated in cells to produce  $N_3$ -PC via the PC-synthetic pathway. The *de novo* synthesized  $N_3$ -PC is distributed  
4 to various organelles. Organelle-targeting clickable dyes (OCDs) selectively react with  $N_3$ -PC to generate dye-  
5 labeled PC in the corresponding subcellular compartments, allowing information about the localization and quantity  
6 of  $N_3$ -PC to be obtained from fluorescence wavelength and intensity, respectively. Thus, on the basis of changes in  
7 fluorescence patterns of dye-labeled PC, single cells exhibiting specific subcellular lipid phenotypes can be  
8 identified and isolated with FACS.

9

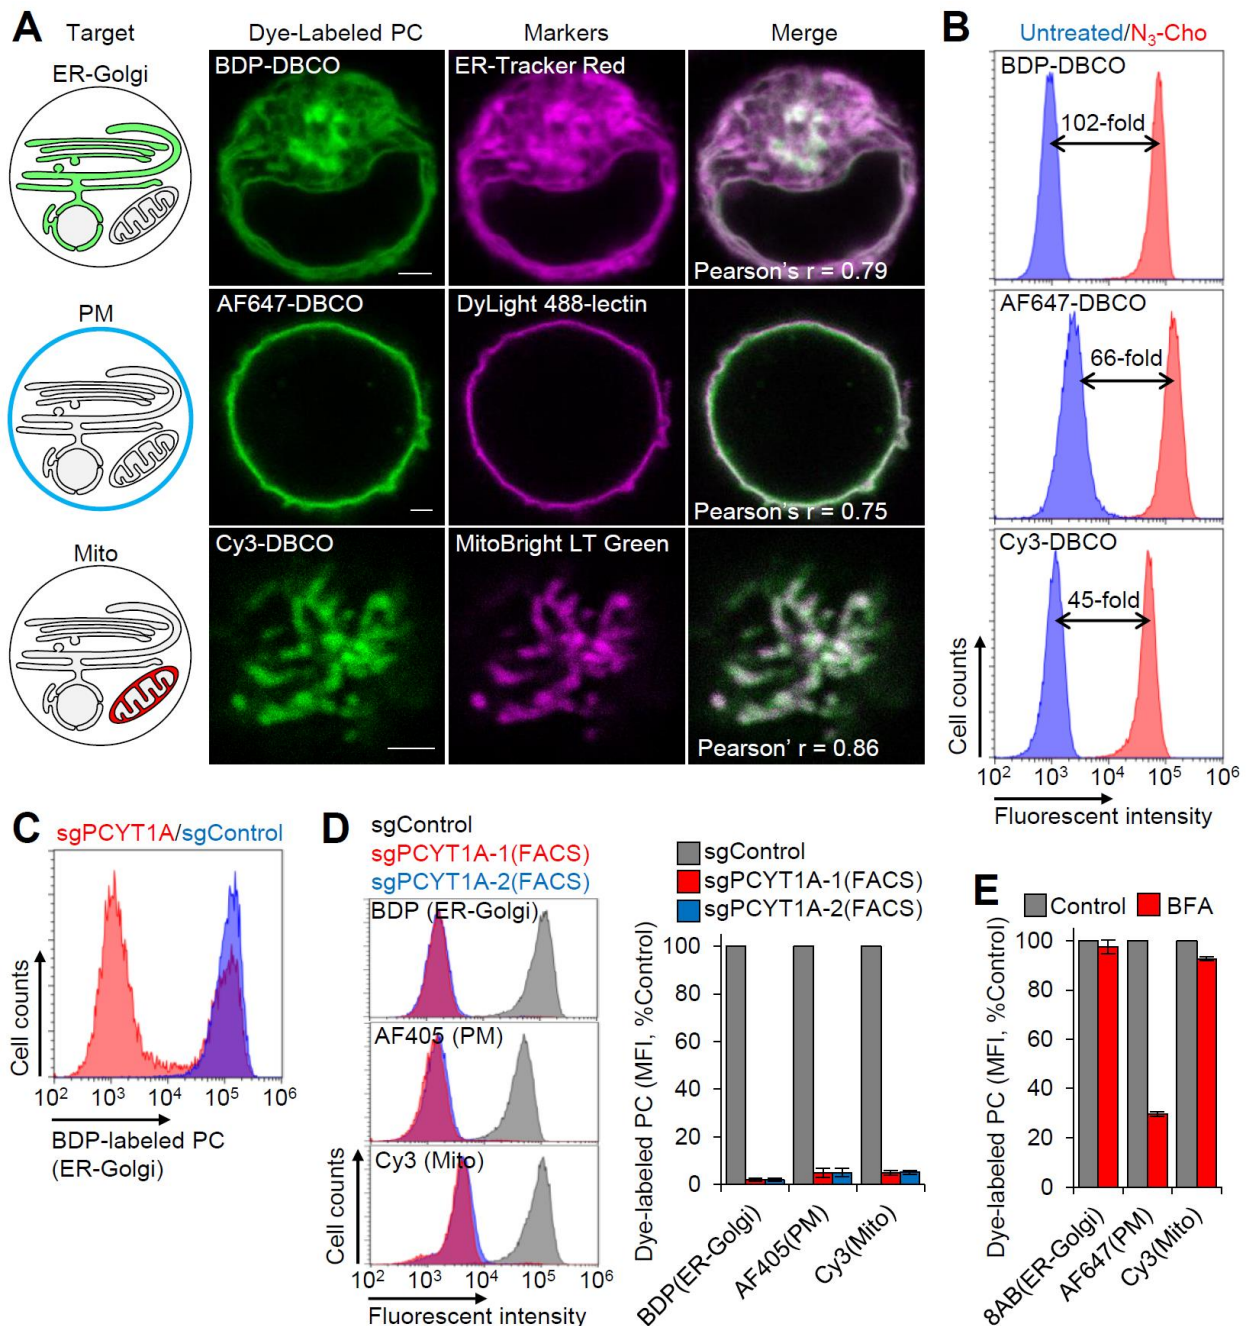

1  
 2 **Figure 2. Flow cytometric measurements of  $N_3$ -PC abundance at the organelle level.** (A) Confocal imaging of  
 3 organelle-selective  $N_3$ -PC labeling.  $N_3$ -Cho-treated K562 cells were labeled with ER-Golgi-targeting BDP-DBCO,  
 4 PM-targeting AF647-DBCO, and mitochondria-targeting Cy3-DBCO. Corresponding organelle markers were used  
 5 for colocalization analysis by confocal microscopy. Scale bars represent 2  $\mu$ m. (B) Quantitative measurements of  
 6 organelle-selective  $N_3$ -PC labeling. Non-treated or  $N_3$ -Cho-treated K562 cells were labeled with BDP-DBCO,  
 7 AF647-DBCO, and Cy3-DBCO, and analyzed by flow cytometry. Median fluorescence intensity (MFI) was used  
 8 to calculate fold changes between the two groups. (C) K562 cells transduced with sgControl and sgPCYT1A were  
 9 labeled with BDP-DBCO, followed by analysis with flow cytometry. The majority of sgPCYT1A-transduced cells  
 10 displayed a reduction in BDP fluorescence. (D) Labeling pattern of cells with PC synthesis defects. FACS-isolated  
 11 *PCYT1A*-KO cells [the dimmer subpopulation in (C)] were treated with  $N_3$ -Cho and labeled with BDP (ER-Golgi),  
 12 AF405 (PM), and Cy3 (mitochondria). MFIs analyzed by flow cytometry were used to compare  $N_3$ -PC labeling  
 13 between control and *PCYT1A*-KO cells ( $n = 3$ ). (E) Labeling pattern of cells with BFA-mediated PC transport



1 defects. K562 cells were treated with N<sub>3</sub>-Cho in the presence of 10 μM BFA for 5 hours and labeled with 8AB (ER-  
2 Golgi), AF647 (PM), and Cy3 (mitochondria), followed by flow cytometry (n = 3). Bar graphs represent mean ±  
3 SEM.

1

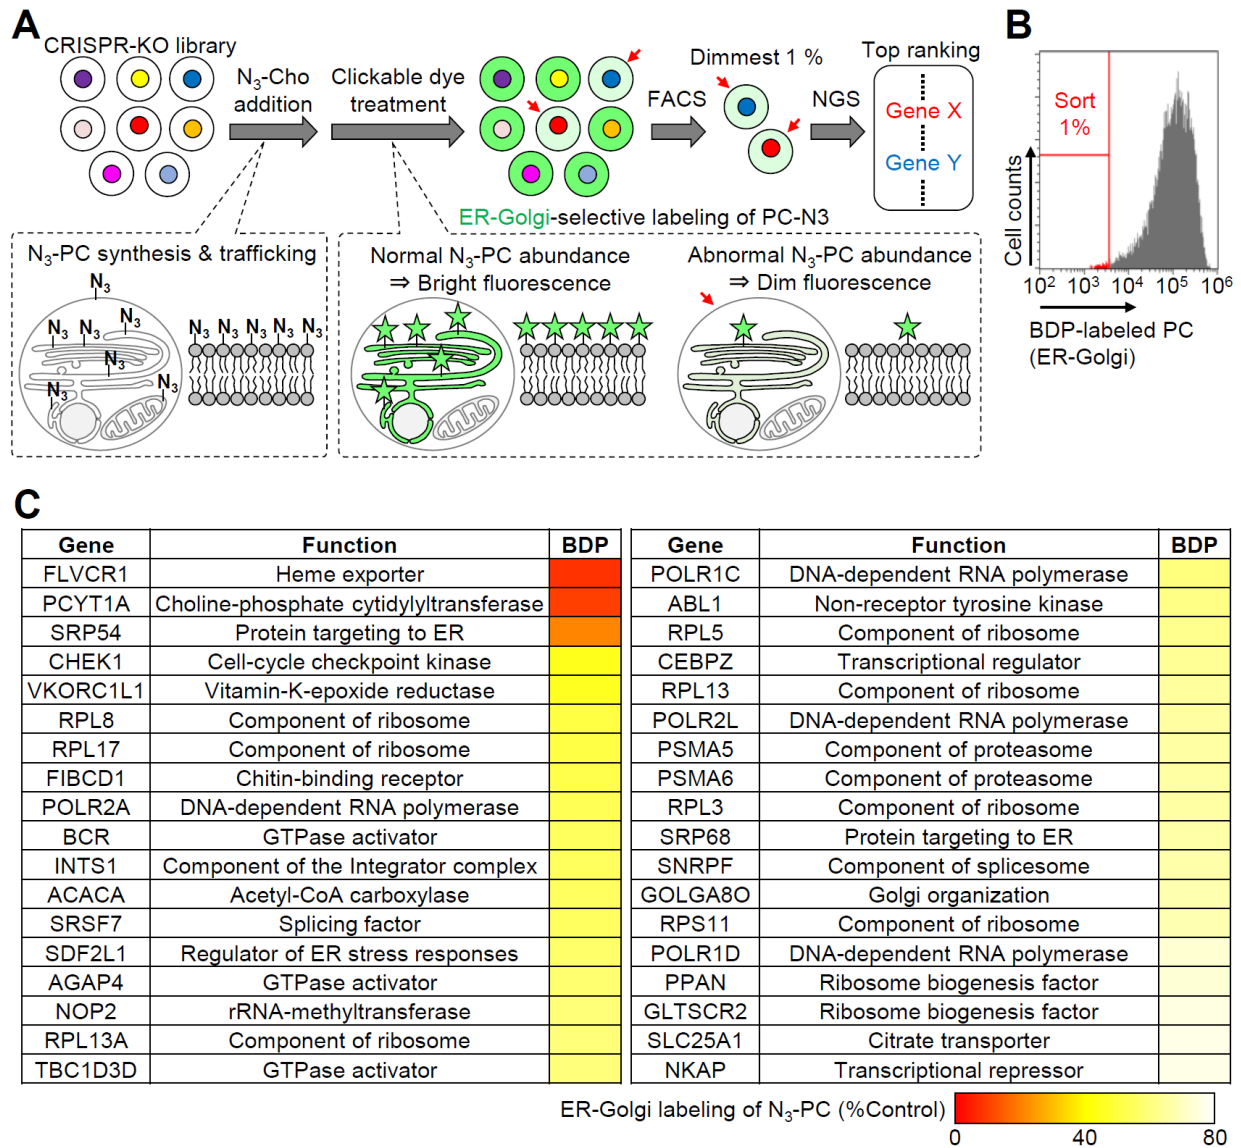

2

3 **Figure 3. O-ClickFC-based CRISPR-KO screening to identify genes involved in PC biosynthesis.** (A)  
 4 Experimental workflow. Cas9-expressing K562 cells were transduced with a genome-wide lentiviral sgRNA library,  
 5 cultured with N<sub>3</sub>-Cho for 1 day, and labeled with ER-Golgi-selective OCD. Target cells with reduced abundance of  
 6 labeled PC (red arrows) were sorted by FACS and subjected to NGS analysis to produce a ranked list of candidate  
 7 genes. (B) GeCKOv2 library-expressing K562 cells with decreased fluorescence (1% of the population) were sorted  
 8 (FACS gating strategy in Figure S4A). (C) A total of 36 hit genes identified from GeCKOv2 and Brunello screens.  
 9 The criteria of hits were set as follows: two or more distinct sgRNAs targeting the same gene displayed < 80% ER-  
 10 Golgi N<sub>3</sub>-PC compared with a nontargeting control sgRNA. The average from multiple sgRNAs is represented by  
 11 a pseudocolor scale.

12

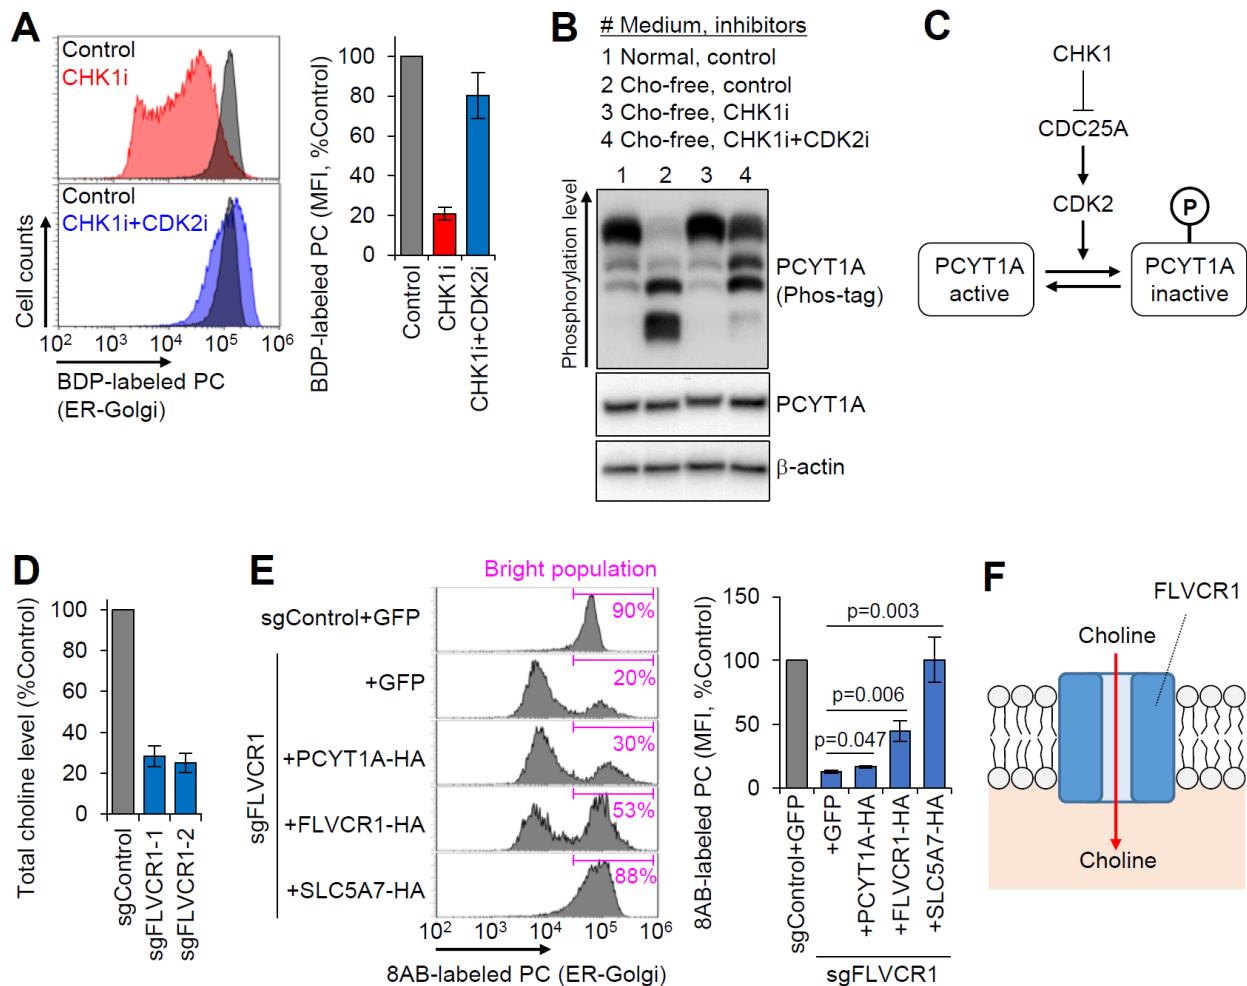

1  
2  
3  
4  
5  
6  
7  
8  
9  
10  
11  
12  
13  
14  
15  
16

**Figure 4. Roles of *CHEK1* and *FLVCR1* in PC synthesis.** (A-C) *CHK1* regulates PC synthesis via modulating phosphorylation state of *PCYT1A*. (A) Flow cytometric analysis of BDP-labeled PC in K562 cells treated with *CHK1* inhibitor (PF-477736) and *CDK2* inhibitor (Cdk2 inhibitor II) (n = 3–10). The inhibitory effect of *CHK1i* on N<sub>3</sub>-PC synthesis was counteracted by *CDK2i*. (B) Effect of *CHK1* and *CDK2* inhibition on *PCYT1A* phosphorylation was analyzed by phos-tag electrophoresis, wherein highly phosphorylated *PCYT1A* migrated slower than its poorly phosphorylated form. Choline depletion promoted dephosphorylation of *PCYT1A* (lane 1 vs 2). Inhibition of *CHK1* in choline-free culture provoked *PCYT1A* to hyper-phosphorylate state (lane 2 vs 3). Dual treatment of *CHK1* and *CDK2* inhibitors led to mild phosphorylation of *PCYT1A* (lane 3 vs 4). (C) Schematic showing how the *CHK1*-*CDC25A*-*CDK2* pathway regulates *PCYT1A*-mediated PC synthesis. (D–F) *FLVCR1* acts as a choline transporter. (D) Endogenous choline levels in control- and *FLVCR1*-KO K562 cells (n = 3). (E) The rescue effect of exogenous *SLC5A7* expression on ER-Golgi N<sub>3</sub>-PC level in *FLVCR1*-KO cells. *FLVCR1*-KO K562 cells were infected with lentiviruses expressing GFP (control), HA-tagged *PCYT1A*, *FLVCR1*, or *SLC5A7*, and subjected to flow cytometric analysis of ER-Golgi N<sub>3</sub>-PC (n = 3–6, Student's t-test). (F) Schematic illustration showing *FLVCR1*-mediated choline transport. Bar graphs represent mean  $\pm$  SEM.

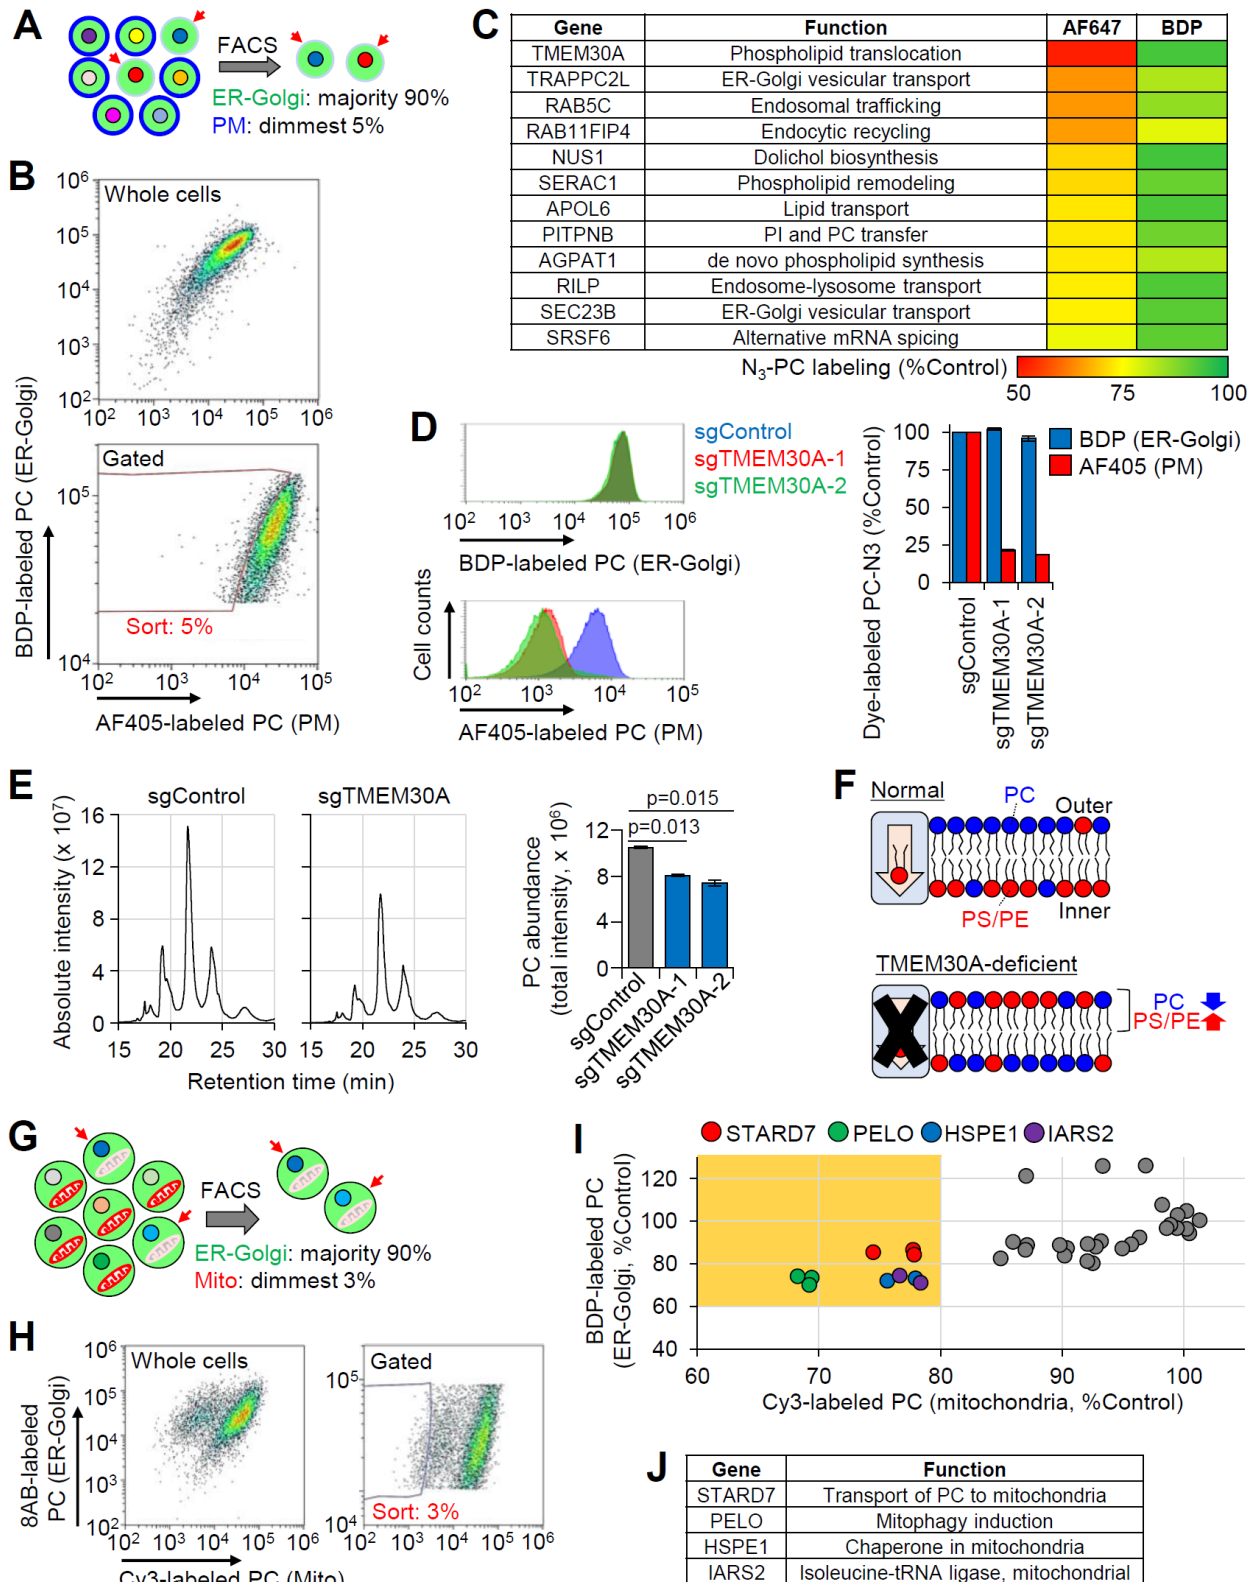

1

2 **Figure 5. O-ClickFC-based CRISPR-KO screening focusing on N<sub>3</sub>-PC subcellular PC trafficking.** (A)  
 3 CRISPR-KO screen based on N<sub>3</sub>-PC distribution in the ER-Golgi and PM. K562 cells transduced with a genome-  
 4 wide CRISPR-KO library were labeled with ER-Golgi-selective OCD (BDP) and PM-selective OCD (AF405).  
 5 Target cells with normal BDP fluorescence and weak AF405 fluorescence were sorted by FACS. (B) Brunello  
 6 library-expressing K562 cells with decreased PM N<sub>3</sub>-PC (~5% of the parent population) were sorted (FACS gating  
 7 strategy in Figure S6A). (C) List of 12 hit genes presumed to be involved in PC transport from the ER-Golgi to the

1 PM. Heatmap shows averaged N<sub>3</sub>-PC levels in PM (AF647) and ER-Golgi (BDP) for each gene (data from Figure  
2 S6B). (D-F) TMEM30A allows PC translocation to the outer leaflet of PM (OPM). (D) N<sub>3</sub>-PC levels in ER-Golgi  
3 and PM in control and *TMEM30A*-KO cells (n = 3). (E) LC-MS/MS analysis of endogenous PC extracted from  
4 OPM of control and *TMEM30A*-KO cells by methyl- $\alpha$ -cyclodextrin-mediated lipid exchange (n = 2, Student's t-  
5 test). (F) Schematic illustration showing decreased PC and increased PS/PE in the OPM of TMEM30A-deficient  
6 cells. (G) CRISPR-KO screen based on N<sub>3</sub>-PC distribution in the ER-Golgi and mitochondria. Target cells with  
7 normal BDP fluorescence and weak Cy3 fluorescence were sorted by FACS. (H) Brunello library-expressing K562  
8 cells with decreased mitochondrial N<sub>3</sub>-PC (~3% of the parent population) were sorted (FACS gating strategy in  
9 Figure S6G). (I) Individual testing of 37 sgRNAs targeting 30 genes that were selected from the top 200. Two-  
10 dimensional dot plot displays fluorescence levels of Cy3-labeled mitochondrial PC and BDP-labeled ER-Golgi PC  
11 in sgRNA-transduced K562 cells (represented as mean). Multiple sgRNAs targeting *STARD7*, *PELO*, *HSPE1*, and  
12 *IARS2* showed > 60% ER-Golgi N<sub>3</sub>-PC and < 80% mitochondrial N<sub>3</sub>-PC compared with a nontargeting sgRNA  
13 (orange area). (J) List of four hit genes presumed to be involved in PC transport from the ER-Golgi to mitochondria.  
14 Bar graphs represent mean  $\pm$  SEM.  
15

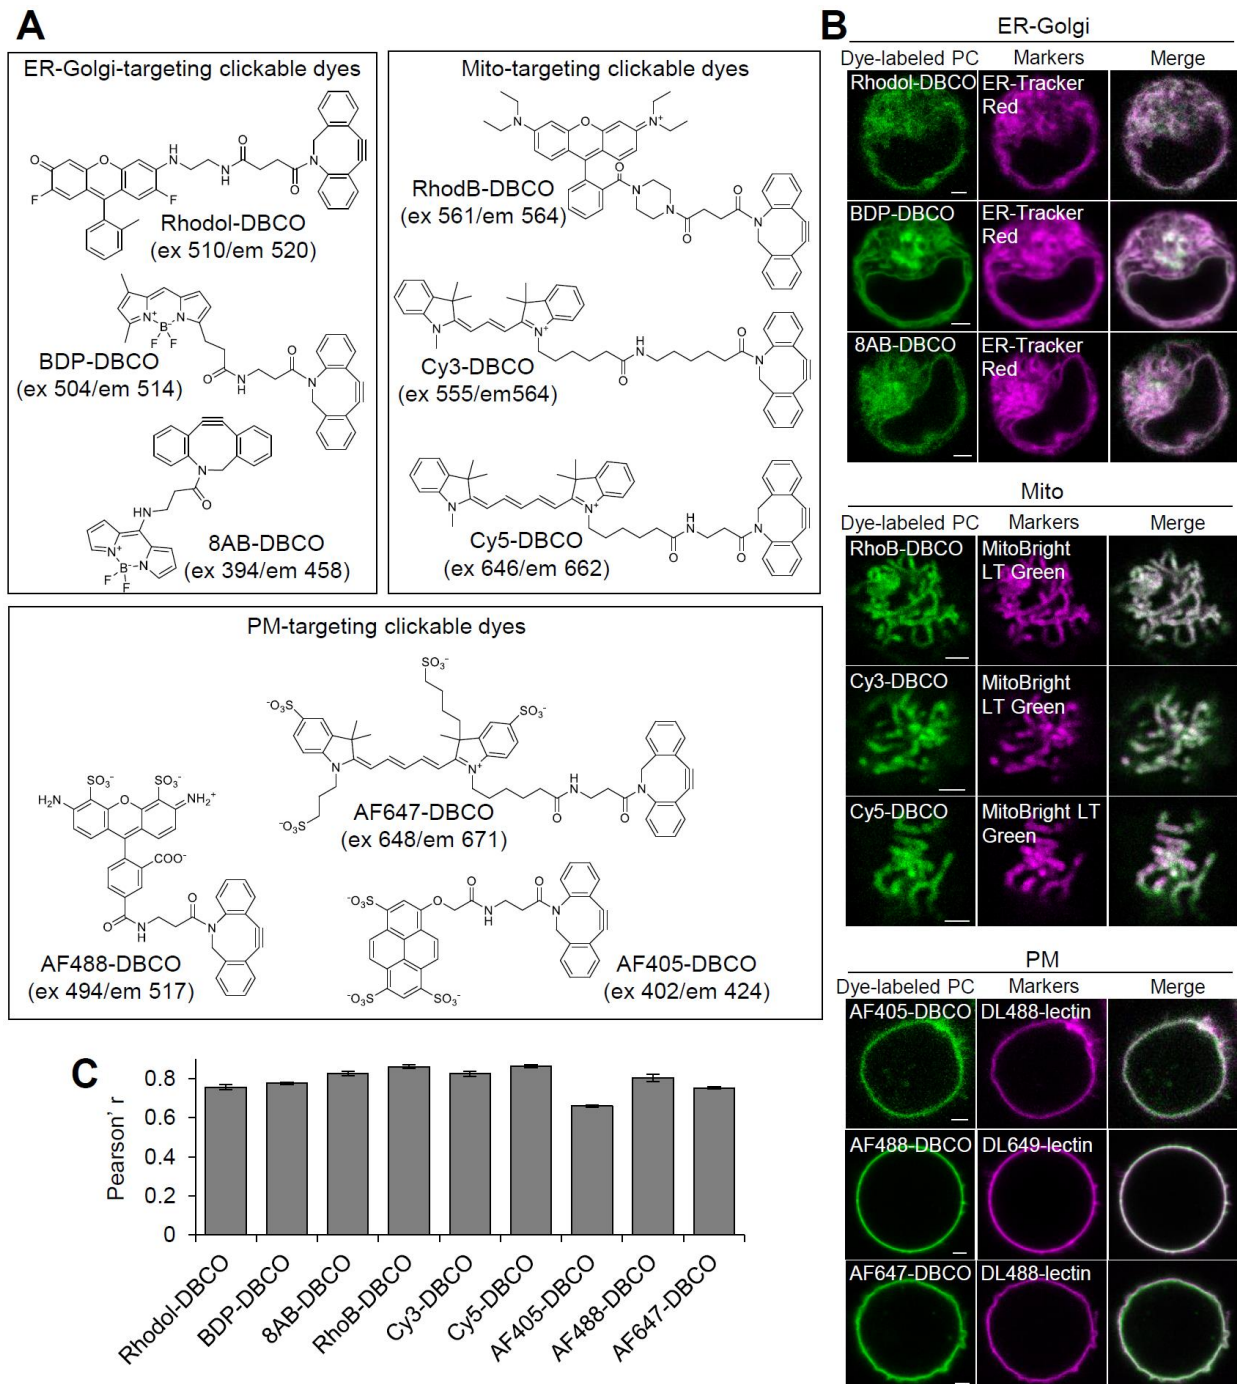

1  
 2 **Figure S1. Supporting data for imaging of organelle-selective N<sub>3</sub>-PC labeling, related to Figure 2.** (A)  
 3 Chemical structures of organelle-targeting clickable dyes (OCDs). Rhodol, RhodB, and 8AB were prepared in-  
 4 house, and the others were obtained commercially. (B) Confocal images of K562 cells treated with N<sub>3</sub>-Cho and  
 5 labeled with OCDs (ER-Golgi: Rhodol-DBCO, BDP-DBCO, 8AB-DBCO; PM: AF405-DBCO, AF488-DBCO,  
 6 AF647-DBCO; Mitochondria: RhoB-DBCO, Cy3-DBCO, Cy5-DBCO) and organelle markers (ER-Golgi: ER-  
 7 Tracker Red; PM: DL488/649-lectin; Mitochondria: MitoBrightLT Green). Scale bar = 2 μm. (C) Graph shows the  
 8 Pearson's correlation coefficient from each group (n = 4–8). Bar graphs represent mean ± SEM.

9  
 10

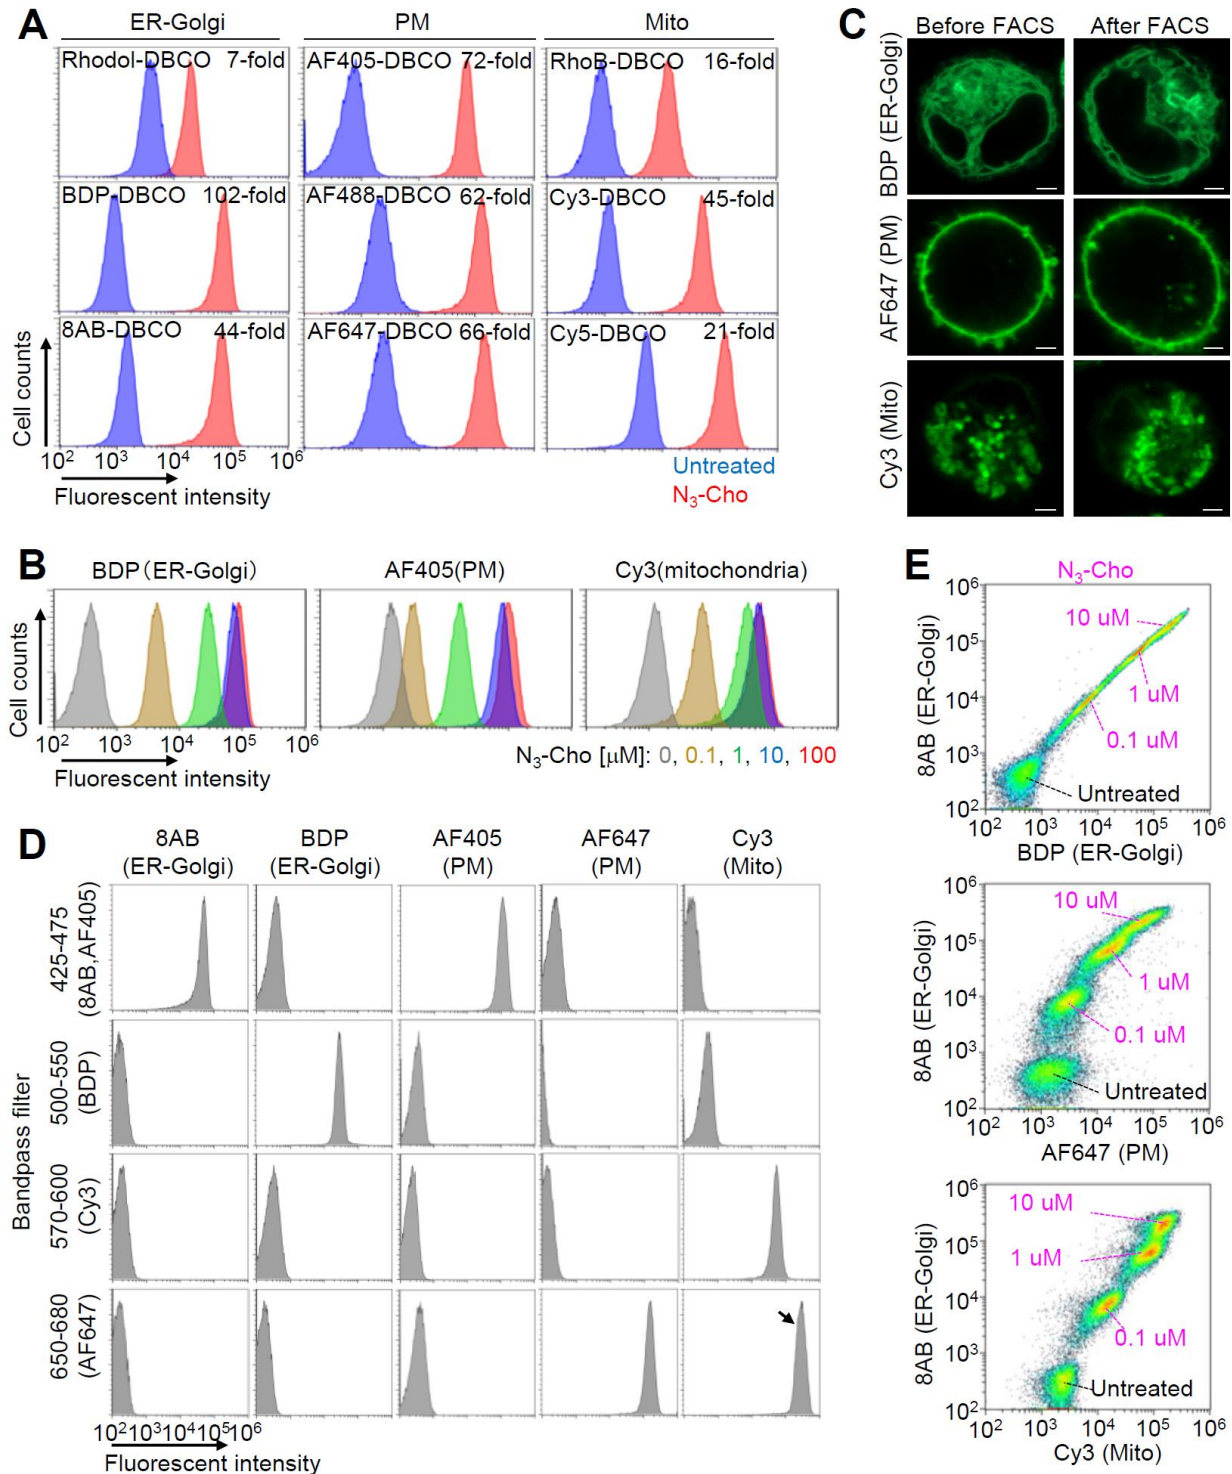

1

2 **Figure S2. Supporting data for flow cytometric measurements of organelle-selective N<sub>3</sub>-PC labeling, related**  
 3 **to Figure 2.** (A) Quantification of organelle-selective N<sub>3</sub>-PC labeling. K562 cells incubated overnight with 0  
 4 (control) or 10  $\mu$ M N<sub>3</sub>-Cho were labeled with OCDs and analyzed by flow cytometry. MFIs were used to calculate  
 5 fold change between control and N<sub>3</sub>-Cho-treated cells (n = 2–3). (B) Flow cytometric analyses of K562 cells treated  
 6 with varying concentrations of N<sub>3</sub>-Cho (0, 0.1, 1, 10, 100  $\mu$ M) overnight, and labeled with BDP-DBCO, AF405-  
 7 DBCO, or Cy3-DBCO. Overlaid histograms show that fluorescence increase of labeled PC depended on the N<sub>3</sub>-  
 8 Cho concentration and saturated at 10  $\mu$ M. (C) Images of PC labeled with BDP-DBCO, AF647-DBCO, or Cy3-  
 9 DBCO before (left) and after (right) FACS, showing no major changes in fluorescence intensity or intracellular  
 10 distribution. Scale bar = 2  $\mu$ m. (D) Test of fluorescence leakage in flow cytometric analysis of OCDs with multiple

1 different bandpass filters. Histograms show no obvious crossover in the following combinations: 8AB-BDP, 8AB-  
2 Cy3, 8AB-AF647, BDP-AF405, BDP-AF647, and AF405-Cy3. The arrow denotes fluorescence from quencher  
3 Cy5-N<sub>3</sub>. (E) Two-dimensional flow cytometric analysis of N<sub>3</sub>-PC distribution with dual organelle labeling. K562  
4 cells were separately treated with different concentrations of N<sub>3</sub>-Cho (0, 0.1, 1, 10 μM) overnight, and pooled into  
5 one tube. After dual labeling with 8AB-DBCO and BDP-DBCO, 8AB-DBCO and AF647-DBCO, or 8AB-DBCO  
6 and Cy3-DBCO, cells were analyzed by flow cytometry. Dot plots show that a bulk population was separated into  
7 four groups with different fluorescence levels corresponding to N<sub>3</sub>-Cho concentrations.  
8



1

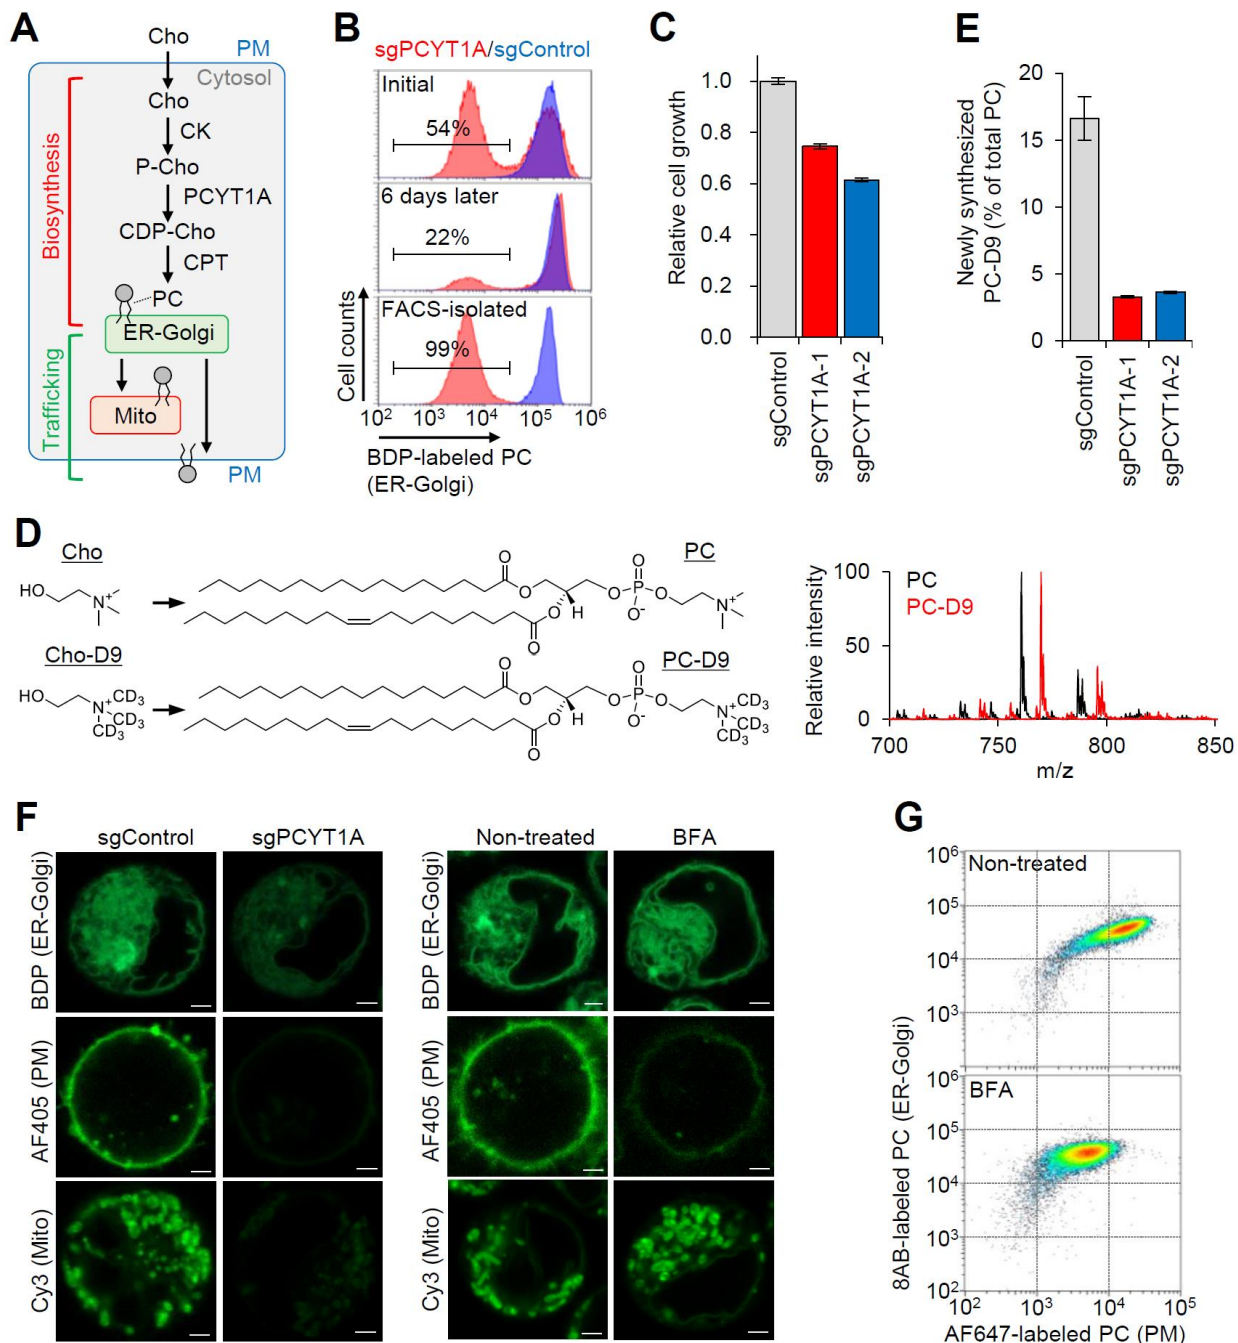

2

3

4

5

6

7

8

9

10

11

12

13

**Figure S3. Supporting data for characterization of *PCYT1A*-deficient cells and BFA-treated cells, related to Figure 2.** (A) Schematic of PC biosynthesis and trafficking in mammalian cells. (B) FACS isolation of *PCYT1A*-deficient cells based on  $N_3$ -PC level in ER-Golgi. In sg*PCYT1A*-transduced cells, the BDP-dim population (fluorescence intensity between  $10^3$  and  $10^4$ ) decreased over time (initial vs 6 days later) and was isolated by FACS. Sorted cells were expanded and subjected to a second analysis (FACS-isolated). (C) Proliferation of *PCYT1A*-KO K562 cell (n = 4). (D) LC-MS/MS analysis of *de novo*-synthesized PC-D9 in whole-cell lysates of *PCYT1A*-KO K562 cells. A precursor ion scan of m/z 184 and 193 was used for PC and PC-D9, respectively. (E) Quantification in (D) (n = 3). PC-D9 content was calculated as the percentage of PC-D9 to total PC and PC-D9. (F) Confocal images of control (left), *PCYT1A*-KO cells (middle-left), non-treated (middle-right), and BFA-treated cells (right) labeled with different OCDs. Cells prepared for flow cytometry in Figure 2D and E were subjected to confocal laser scanning microscopy. All three types of fluorescence (BDP, AF405, and Cy3) were decreased in *PCYT1A*-KO cells,

1 compared with control CRISPR cells. No major changes in ER-Golgi or mitochondrial fluorescence were observed,  
2 but a decrease in PM fluorescence was observed in BFA-treated cells compared with non-treated cells. Scale bar =  
3 2  $\mu$ m. (G) Two-dimensional flow cytometric analysis of N<sub>3</sub>-PC distribution in BFA-treated cells. K562 cells were  
4 treated with N<sub>3</sub>-Cho in the absence (top) or presence (bottom) of BFA, and then labeled with 8AB-DBCO and  
5 AF647-DBCO. MFI of AF647 was decreased, but 8AB was unchanged in BFA-treated cells compared with non-  
6 treated cells. Bar graphs represent mean  $\pm$  SEM.

7

8

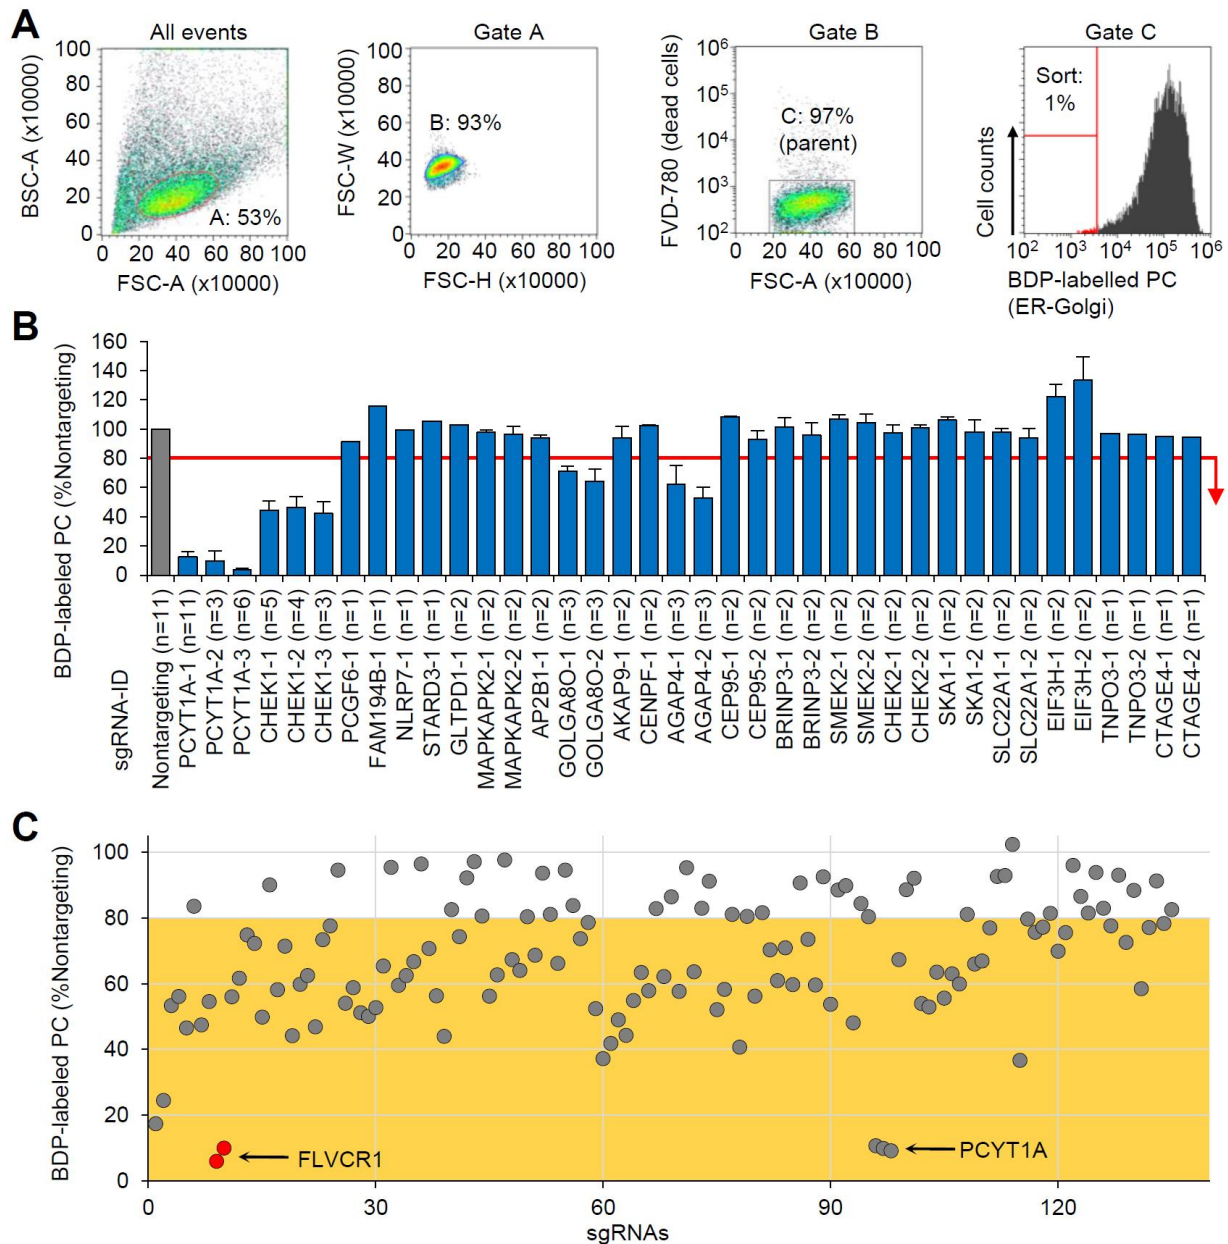

1  
 2 **Figure S4. Supporting data for CRISPR-KO screening of N<sub>3</sub>-PC in the ER-Golgi, related to Figure 3.** (A)  
 3 FACS gating strategy for ER-Golgi-focused screening. Using forward scatter (FSC) and back scatter (BSC), live  
 4 cells were distinguished from cell debris and dead cells (All events). Singlet cells were separated from doublet cells  
 5 on physical parameters (FSC-H vs FSC-W, Gate A). Live cells were confirmed by negative staining with the dead-  
 6 cell marker FVD780 (Gate B). Cells exhibiting weak fluorescence indicating BDP-labeled PC (~1% of parent  
 7 population) were sorted (Gate C). (B) Individual testing of 38 sgRNAs targeting 22 genes selected from the top 100  
 8 in the GeCKOv2 screening. MFI was used to compare ER-Golgi N<sub>3</sub>-PC levels between nontargeting and gene-  
 9 targeting sgRNAs. Cells that exhibited lower than 80% fluorescence intensity compared with nontargeting control  
 10 were considered hits. The 80% threshold is shown as a red line in the graph. Bar graphs represent mean ± SEM. (C)  
 11 Individual testing of 135 sgRNAs targeting 77 genes selected from the top 100 in the Brunello screening. Dot plot  
 12 shows 90 sgRNAs below the threshold level of 80% (orange area). sgRNAs targeting *FLVCR1* and *PCYT1A* are  
 13 highlighted. Dot plot represents the mean.

14

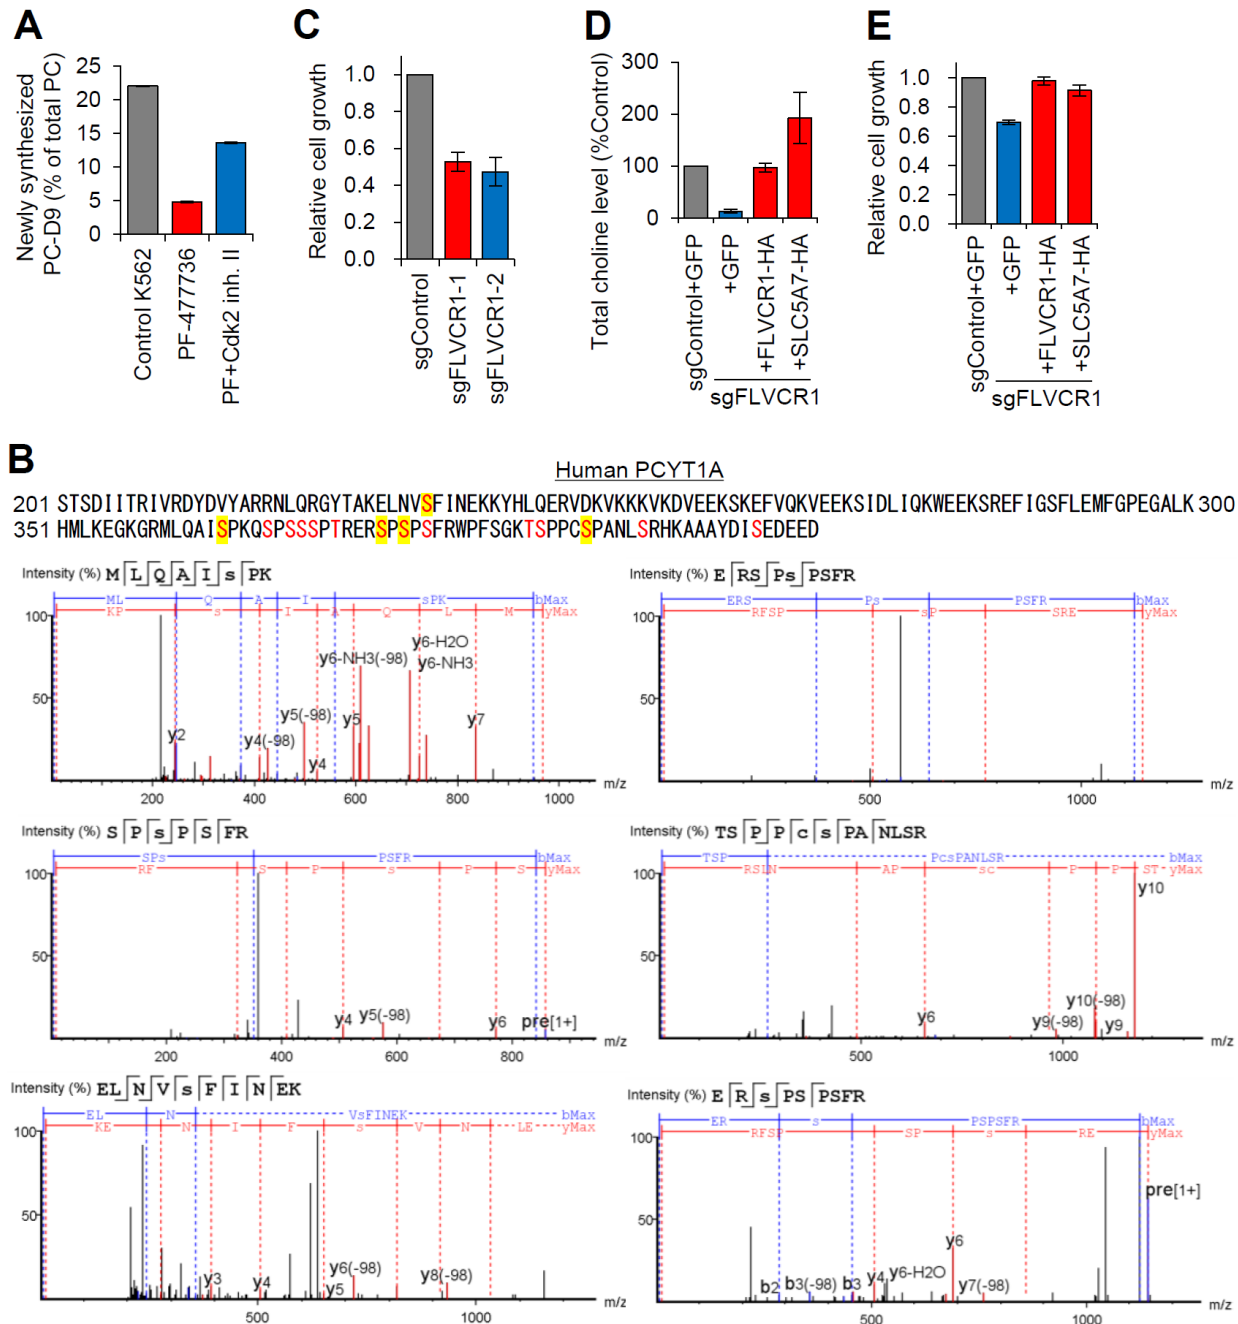

1  
 2 **Figure S5. Supporting data for roles of *CHEK1* and *FLVCR1* in PC synthesis, related to Figure 4.** (A)  
 3 Quantitative LC-MS/MS analysis of PC-D9 levels in whole-cell lysate of K562 cells treated with CHK1i (PF-  
 4 477736) and CDK2i (Cdk2 inhibitor II) (n = 3). (B) Phosphorylation sites of PCYT1A. Phosphorylation of serine  
 5 and threonine in red characters was previously reported based on sequence similarity (UniProtKB reference number:  
 6 P49585). Phosphorylated serine residues highlighted in yellow were detected in this MS/MS analysis of PCYT1A  
 7 protein, which was extracted from K562 cells cultured in normal growth medium. (C) Proliferation of *FLVCR1*-KO  
 8 K562 cells (n = 3). (D) Total endogenous choline levels in control or *FLVCR1*-KO K562 cells expressing GFP, HA-  
 9 tagged FLVCR1, or HA-tagged SLC5A7 (n = 4). (E) Proliferation of control or *FLVCR1*-KO K562 cells expressing  
 10 GFP, HA-tagged FLVCR1, or HA-tagged SLC5A7 (n = 3). Bar graphs represent mean  $\pm$  SEM.

11

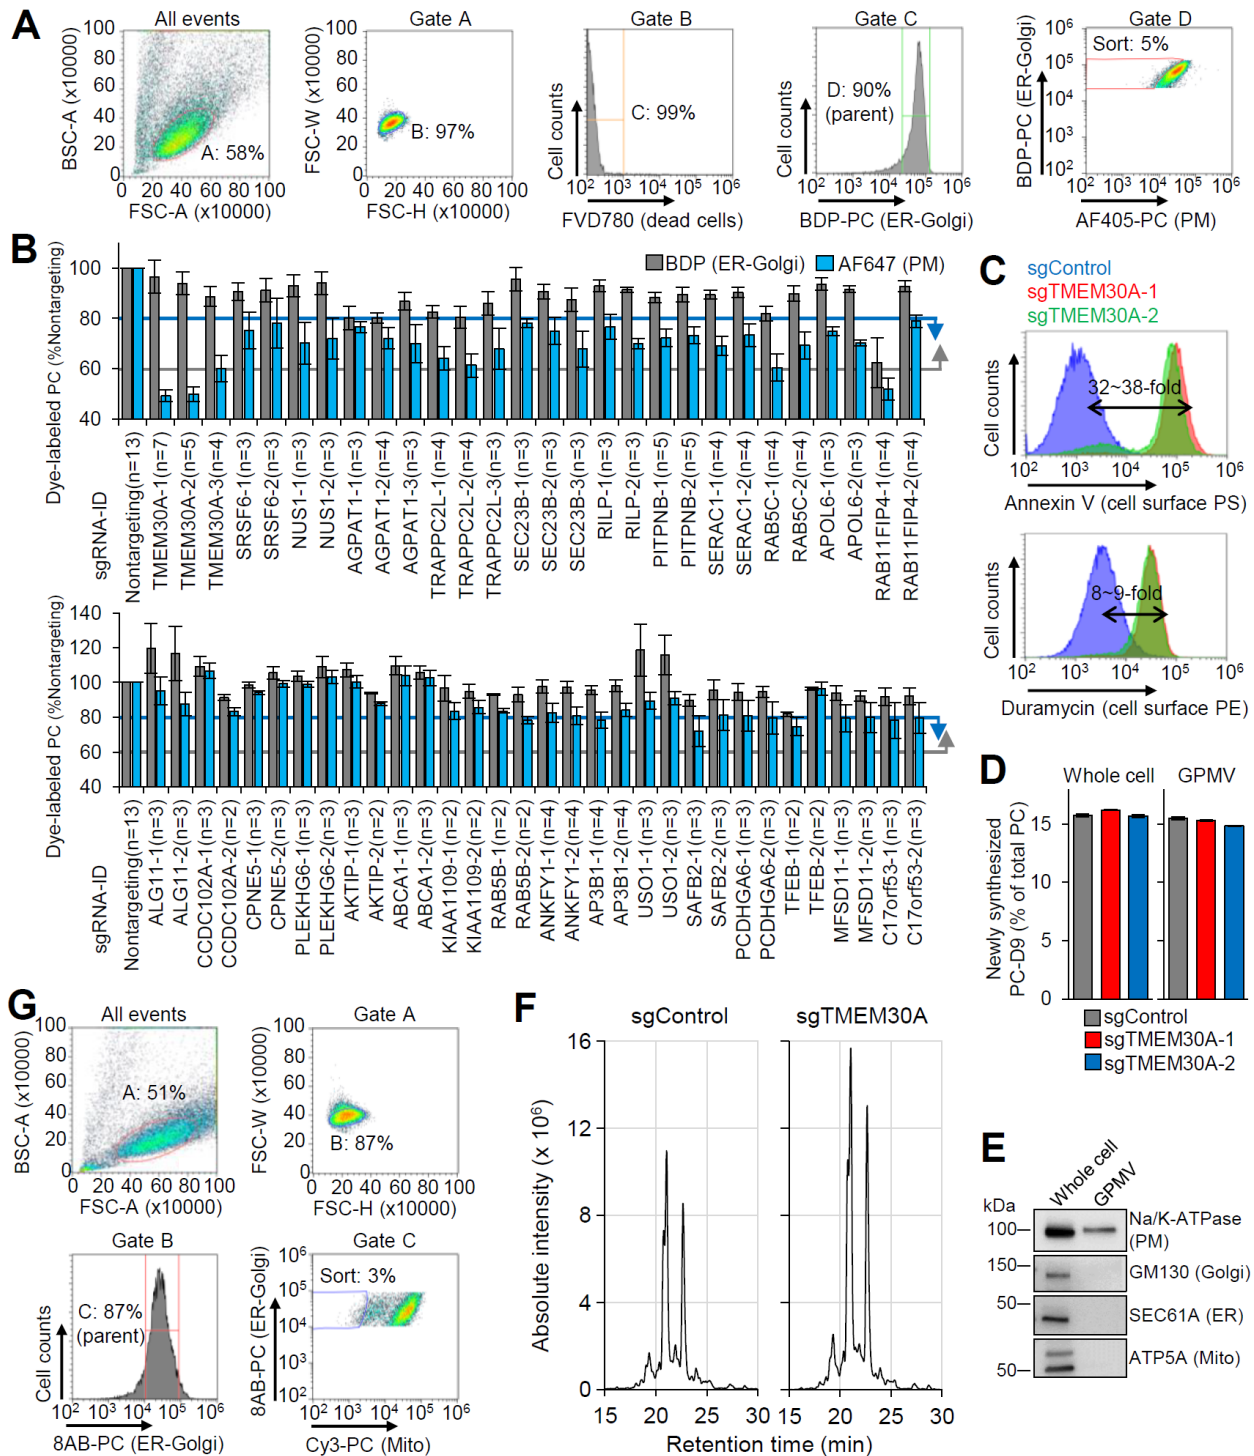

1

2 **Figure S6. Supporting data for CRISPR-KO screening focusing on subcellular PC trafficking of N<sub>3</sub>-PC,**  
 3 **related to Figure 5. (A) FACS gating strategy in PM-focused screening. Live singlet cells were obtained at Gate B.**  
 4 **The majority of cells with robust BDP fluorescence intensity indicating ER-Golgi N<sub>3</sub>-PC were separated (Gate C).**  
 5 **Cells exhibiting weak AF405 fluorescence in PM N<sub>3</sub>-PC (~5% of the parent population) were sorted (Gate D).**  
 6 **Individual testing of 60 sgRNAs targeting 28 genes selected from the top 100. MFIs of labeled PC were compared**  
 7 **between nontargeting and gene-targeting sgRNAs. The upper graph shows 28 sgRNAs satisfying the criteria: > 60%**  
 8 **ER-Golgi labeling (grey line) and < 80% PM labeling (blue line). The lower graph shows the remaining 32 sgRNAs**  
 9 **that failed to fulfill the criteria. (C) FACS analysis of cell-surface PS and PE with PS-binding annexin V and PE-**  
 10 **binding duramycin (n = 3). (D) LC-MS/MS analysis of PC-D9 contents in whole-cell lysate and giant plasma**

1 membrane vesicle (GPMV) from control and *TMEM30A*-KO cells (n = 3). (E) The purity of GPMV was confirmed  
2 by WB. (F) LC-MS/MS analysis of PE extracted from the PM outer leaflet of control and *TMEM30A*-KO cells by  
3 methyl- $\alpha$ -cyclodextrin-mediated lipid exchange. PE was increased in the outer PM of *TMEM30A*-KO cells. (G)  
4 FACS gating strategy in mitochondrial screening. Live singlet cells were obtained at Gate A. The majority of cells  
5 with robust 8AB fluorescence intensity in ER-Golgi N<sub>3</sub>-PC were separated (Gate B). Cells exhibiting weak Cy3  
6 fluorescence in mitochondrial N<sub>3</sub>-PC (~3% of the parent population) were sorted (Gate C). All bar graphs represent  
7 mean  $\pm$  SEM.
